# Supplementary material for: Isolation and identification of an α-glucosidase inhibitory peptide from extruded soybean protein and its hypoglycemic activity in T2DM mice
Source: Royal Society of Chemistry journal article supplement (doi:10.1039/d3fo00580a), 2023-01-01
Supplement: d3fo00580a1.pdf [file d3fo00580a1.pdf]

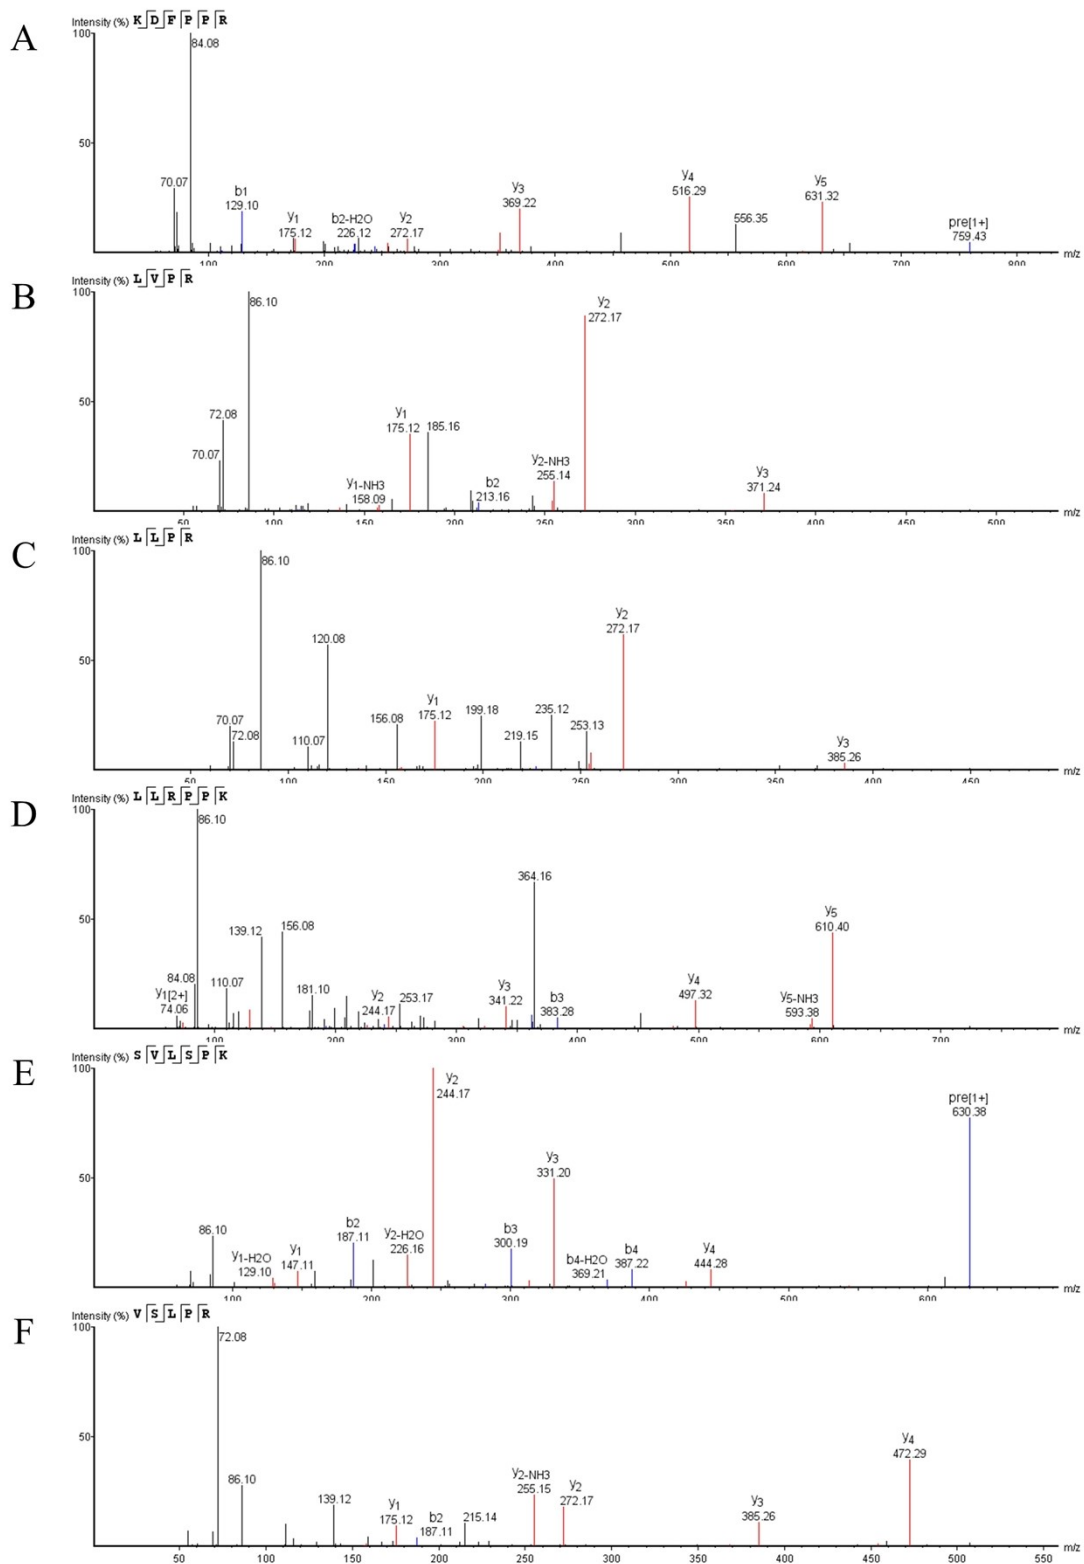

**Fig. S1** The secondary mass spectra of the peptides with  $\alpha$ -glucosidase inhibitory activity in the purified ESPro1 products.
