# Supplementary material for: Isolation and identification of an α-glucosidase inhibitory peptide from extruded soybean protein and its hypoglycemic activity in T2DM mice
Source: Royal Society of Chemistry journal article supplement (doi:10.1039/d3fo00580a), 2023-01-01
Supplement: d3fo00580a2.xlsx [file d3fo00580a2.xlsx]

## Sheet: peptides
Total peptides in purified SPro F3 fraction
Peptide	Scan	Score	Length	m/z	z	RT	Area	Mass	ppm
HLSVVHPI	18752	51.92	8	901.523	1	38.29	54600000	900.518	-3
HLSVVHPI	18752	51.92	8	901.523	1	38.29	54600000	900.518	-3
KYQGNSGPL	10236	48.9	9	963.488	1	20.93	531000000	962.482	-1.2
ADFYNPK	13655	42.02	7	854.402	1	27.73	168000000	853.397	-2.2
VHTGSGKLT	3256	41.98	9	899.492	1	7.6	45700000	898.487	-3.1
QHGNIGGPY	10843	40.86	9	942.442	1	22.14	171000000	941.436	-0.9
QAALQTPK	7291	39.96	8	856.486	1	15.05	345000000	855.481	-2.8
QIKNNNPF	15150	39.88	8	974.504	1	30.82	343000000	973.498	-1.6
NPNNKPF	8088	39.38	7	830.413	1	16.65	826000000	829.408	-2.9
NALKPDNR	3237	38.77	8	927.498	1	7.57	154000000	926.493	-2.6
LGC(+57.02)TIKPK	5606	37.3	8	458.767	2	11.67	62100000	915.521	-1.8
LNSC(+57.02)HSAC(+57.02)	2965	36.98	8	948.363	1	7.15	15000000	947.359	-3.6
LNSC(+57.02)HSAC(+57.02)	2965	36.98	8	948.363	1	7.15	15000000	947.359	-3.6
DGATRHPL	4550	36.83	8	433.726	2	9.71	44000000	865.441	-2.8
GDVSRPKPM	5868	36.62	9	493.757	2	12.19	55100000	985.501	-1.1
NLHAPNPK	5011	36.53	8	445.745	2	10.52	34500000	889.477	-2.3
YEGNWGPL	40077	35.54	8	935.424	1	86.96	89000000	934.418	-2.3
KHTGPGL	3579	35.54	7	355.202	2	8.09	18600000	708.392	-3.3
GQTPLFPR	22894	35.49	8	458.255	2	47.23	163000000	914.497	-2.6
YQGNSGPL	15230	35.07	8	835.392	1	30.98	18200000	834.387	-2.9
GGPPGDRPR	3014	34.19	9	303.494	3	7.23	24500000	907.462	-1.9
NGATRHPL	3516	33.4	8	433.235	2	7.99	12300000	864.457	-2.1
QVKNNNPF	11857	33.37	8	960.488	1	24.12	31300000	959.482	-1.8
KTNDRPSIG	4880	32.98	9	987.52	1	10.29	3260000000	986.514	-1.7
GMIFPGC(+57.02)PS	35931	32.93	9	965.42	1	76.69	51400000	964.415	-1.5
VVPPGHPF	21084	32.77	8	849.459	1	43.26	2050000000	848.455	-3.2
DLNFTPR	22714	32.75	7	862.44	1	46.86	62900000	861.434	-1.6
GGNPNPPR	3299	32.49	8	404.706	2	7.66	14800000	807.399	-2.5
HTNPTKPI	4352	31.95	8	907.499	1	9.38	14200000	906.492	-1
SVFPSPK	15884	31.94	7	761.417	1	32.35	60500000	760.412	-3.4
HLSALHPI	18317	31.54	8	444.258	2	37.37	12700000	886.502	-1.5
DQMPR	4057	31.47	5	646.296	1	8.87	93300000	645.29	-2.1
EGGIKLPR	13776	31.32	8	435.263	2	27.98	574000000	868.513	-1.8
LKTITPK	5455	30.81	7	800.52	1	11.37	21300000	799.517	-4.7
DHGPWPK	8986	30.24	7	418.704	2	18.43	1200000000	835.398	-4.3
SGKPGPL	6535	30.21	7	655.376	1	13.45	60000000	654.37	-1.6
AALQTPK	6405	30.15	7	728.427	1	13.2	138000000	727.423	-4
KYEGNWGP	19179	30.14	8	950.434	1	39.21	63400000	949.429	-2.8
GTVVLMPK	21190	30.11	8	422.751	2	43.51	19100000	843.489	-2.3
GTVVLMPK	21190	30.11	8	422.751	2	43.51	19100000	843.489	-2.3
ITHSVPF	22577	29.82	7	800.429	1	46.56	105000000	799.423	-1.9
VVPPGHP	8006	29.73	7	702.39	1	16.49	3110000000	701.386	-4.2
SFLVPPK	24804	29.73	7	394.238	2	51.31	119000000	786.464	-2
NAMFVPH	20362	29.66	7	815.384	1	41.73	2100000000	814.38	-3.6
GMIYPGC(+57.02)PS	26309	29.6	9	981.415	1	54.56	48900000	980.409	-1.8
NEPWWPK	33816	29.58	7	956.461	1	71.55	100000000	955.455	-2
NEPWWPK	33816	29.58	7	956.461	1	71.55	100000000	955.455	-2
APKPPSTGL	14532	29.54	9	434.249	2	29.54	14300000	866.486	-3.1
KNGIYSPH	5413	29.45	8	915.463	1	11.28	97300000	914.461	-5.3
C(+57.02)FC(+57.02)SRPC(+57.02)	8124	29.35	7	493.685	2	16.73	23200000	985.357	-0.3
HVRPPNPK	3026	29.33	8	315.519	3	7.24	36800000	943.535	-1.4
SVISPK	5617	29.31	6	630.381	1	11.69	6040000000	629.375	-2.3
SVISPK	5617	29.31	6	630.381	1	11.69	6040000000	629.375	-2.3
FSQATPK	4997	29.24	7	778.407	1	10.49	10100000	777.402	-3.3
VLSPK	5323	29.05	5	543.349	1	11.13	14900000	542.343	-2.3
VISPK	5323	29.05	5	543.349	1	11.13	14900000	542.343	-2.3
VISPK	5323	29.05	5	543.349	1	11.13	14900000	542.343	-2.3
VISPK	5323	29.05	5	543.349	1	11.13	14900000	542.343	-2.3
C(+57.02)YKPC(+57.02)KS	2846	28.98	7	471.711	2	6.96	15800000	941.41	-2.5
C(+57.02)YKPC(+57.02)KS	2846	28.98	7	471.711	2	6.96	15800000	941.41	-2.5
VSVPK	5707	28.96	5	529.334	1	11.86	187000000	528.327	-0.9
HGNIGGPY	10569	28.78	8	814.383	1	21.61	23100000	813.377	-1.1
YIQQGNGI	16663	28.73	8	892.45	1	33.95	12100000	891.445	-2.3
LGVPHPL	27071	28.58	7	732.438	1	56.25	237000000	731.433	-3.2
GGGTQKPI	4040	28.38	8	757.418	1	8.84	38000000	756.413	-2.9
KFPPPK	3445	28.2	6	713.432	1	7.88	413000000	712.427	-4
NPNNKPFQ	6511	28.15	8	479.74	2	13.41	33100000	957.467	-1.4
HLPSYSPY	23711	28.15	8	963.455	1	48.99	19200000	962.45	-1.7
EGNWGPL	36901	27.99	7	772.359	1	79.05	110000000	771.355	-4.3
C(+57.02)GVISPR	8181	27.8	7	394.707	2	16.83	10300000	787.401	-2.9
TNDRPSIG	7382	27.68	8	430.216	2	15.22	199000000	858.42	-1.9
KDFPPR	9291	27.63	6	380.21	2	18.99	199000000	758.408	-2.3
TTIIPR	12625	27.44	6	350.721	2	25.65	134000000	699.428	-2.1
ISATKPL	12482	27.37	7	729.448	1	25.36	56000000	728.443	-3.5
SIGVKPPK	7531	27.37	8	413.263	2	15.53	20300000	824.512	-0.9
SVVHPI	12030	27.13	6	651.381	1	24.45	307000000	650.375	-2.8
SVVHPI	12030	27.13	6	651.381	1	24.45	307000000	650.375	-2.8
VTIMPK	13138	26.54	6	688.404	1	26.66	18700000	687.399	-3.7
NVTVPK	7025	26.51	6	657.391	1	14.47	132000000	656.386	-2.9
FVNPK	4909	26.46	5	604.345	1	10.34	246000000	603.338	-0.4
FVNPK	4909	26.46	5	604.345	1	10.34	246000000	603.338	-0.4
NFLAGSK	11739	26.41	7	736.395	1	23.9	37600000	735.391	-5
KINPAAPL	19646	26.39	8	823.501	1	40.23	18000000	822.496	-2.9
FVVPPGHPF	35201	26.35	9	498.768	2	74.92	31100000	995.523	-1.4
LVTNPK	4044	26.11	6	671.407	1	8.85	13800000	670.401	-2.8
QGPPHGI	9652	25.91	7	353.187	2	19.74	12000000	704.361	-2.3
KGILDK	5110	25.85	6	673.422	1	10.69	36100000	672.417	-3.6
KGLLDK	5110	25.85	6	673.422	1	10.69	36100000	672.417	-3.6
NMGSILGPH	24570	25.82	9	463.231	2	50.83	19400000	924.449	-2
TIMPK	6594	25.79	5	589.336	1	13.55	28300000	588.331	-2.4
TIMPK	6594	25.79	5	589.336	1	13.55	28300000	588.331	-2.4
TIMPK	6594	25.79	5	589.336	1	13.55	28300000	588.331	-2.4
GM(+15.99)IFPGC(+57.02)PS	28917	25.75	9	981.416	1	60.41	10300000	980.409	-1.2
AQQLPK	4903	25.68	6	684.401	1	10.33	490000000	683.397	-4.2
TNDRPSIGN	6726	25.45	9	487.238	2	13.8	162000000	972.462	-2.1
VGGPF	18647	25.43	5	476.25	1	38.06	15800000	475.243	-1.6
VGGPF	18647	25.43	5	476.25	1	38.06	15800000	475.243	-1.6
ITHTVPF	23523	25.28	7	407.726	2	48.59	25400000	813.438	-2.4
LVHVEPK	5529	25.24	7	411.246	2	11.52	28500000	820.481	-3.1
FAQQLPK	14037	25.01	7	831.47	1	28.51	104000000	830.465	-3.3
FVVPPGHP	23699	24.97	8	849.459	1	48.97	26400000	848.455	-3.1
DFYNPK	15383	24.92	6	783.365	1	31.3	6840000000	782.36	-2.9
DIHSPR	3456	24.91	6	242.129	3	7.9	10100000	723.366	-2.4
SALHPI	12618	24.9	6	637.365	1	25.63	134000000	636.36	-2.1
SRNPIYS	9592	24.79	7	836.423	1	19.61	1350000000	835.419	-3.4
AFPGSAQ	11280	24.69	7	677.323	1	23.03	100000000	676.318	-3.1
AFPGSAQ	11280	24.69	7	677.323	1	23.03	100000000	676.318	-3.1
GQHVIDK	3015	24.65	7	398.719	2	7.23	12300000	795.424	-1.5
MVPAPR	6255	24.48	6	670.369	1	12.91	68000000	669.363	-1.6
GNIGGPY	16137	24.46	7	677.323	1	32.86	74200000	676.318	-2.8
DKPWWPK	25766	24.41	7	478.752	2	53.42	38000000	955.492	-1.4
DKPWWPK	25766	24.41	7	478.752	2	53.42	38000000	955.492	-1.4
QFPFPR	30353	24.37	6	396.212	2	63.68	136000000	790.413	-2.7
AMGSILGPH	23577	24.23	9	441.728	2	48.71	12700000	881.443	-2.1
NNNPF	14982	24.18	5	605.267	1	30.49	416000000	604.26	-1.7
NNNPF	14982	24.18	5	605.267	1	30.49	416000000	604.26	-1.7
NNNPF	14982	24.18	5	605.267	1	30.49	416000000	604.26	-1.7
NNNPF	14982	24.18	5	605.267	1	30.49	416000000	604.26	-1.7
LAGGF	18930	24.18	5	464.25	1	38.68	63400000	463.243	-0.8
LAGGF	18930	24.18	5	464.25	1	38.68	63400000	463.243	-0.8
GVPHPL	14190	24.16	6	619.355	1	28.83	116000000	618.349	-2.1
GTSVIPK	8857	24.03	7	701.417	1	18.19	24400000	700.412	-2.7
GVFPK	10932	23.95	5	547.323	1	22.31	93600000	546.317	-1.6
AQRIPAGT	6425	23.71	8	407.231	2	13.24	67900000	812.45	-3.5
AQRIPAGT	6425	23.71	8	407.231	2	13.24	67900000	812.45	-3.5
LSGKPGPL	13094	23.68	8	384.733	2	26.56	45500000	767.454	-2.3
AFTPL	29245	23.54	5	548.307	1	61.14	152000000	547.301	-2.5
HVSGGHVNPA	3089	23.53	10	487.743	2	7.34	13200000	973.473	-1.2
SVGVR	5798	23.44	5	517.313	1	12.06	310000000	516.302	8.3
SVGVR	5798	23.44	5	517.313	1	12.06	310000000	516.302	8.3
GGLSVIKPPT	26696	23.42	10	484.792	2	55.43	43100000	967.57.02	-1.2
KLVFC(+57.02)PQ	23541	23.28	7	891.473	1	48.63	10800000	890.468	-2.8
TVTVPK	7189	23.21	6	644.396	1	14.84	181000000	643.39	-3
HKIMDKA	2911	23.1	7	421.73	2	7.07	13100000	841.448	-2.8
HKIMDKA	2911	23.1	7	421.73	2	7.07	13100000	841.448	-2.8
IPSHPPR	4409	23.04	7	268.488	3	9.47	16000000	802.445	-3.9
LQTPK	4338	23	5	586.355	1	9.36	107000000	585.349	-1.9
SKRPTIS	3223	22.95	7	394.734	2	7.55	141000000	787.455	-2.4
IGGPY	18586	22.95	5	506.26	1	37.94	15100000	505.254	-1.4
HLPSYSP	16443	22.91	7	800.391	1	33.5	16300000	799.386	-2.8
GPAPGVPH	8691	22.88	8	731.382	1	17.86	13100000	730.376	-2.6
KSPIC(+57.02)QC(+57.02)	5633	22.85	7	892.399	1	11.72	51000000	891.394	-2.9
SVAPF	23081	22.85	5	520.276	1	47.65	38100000	519.269	-1.3
SVAPF	23081	22.85	5	520.276	1	47.65	38100000	519.269	-1.3
LSDSLPGK	9324	22.85	8	816.444	1	19.07	17800000	815.439	-2.6
HENIARPS	3826	22.84	8	462.238	2	8.51	47900000	922.462	-1.5
SNLPY	18460	22.76	5	593.292	1	37.65	12900000	592.286	-1.7
SNLPY	18460	22.76	5	593.292	1	37.65	12900000	592.286	-1.7
SNIPY	18460	22.76	5	593.292	1	37.65	12900000	592.286	-1.7
HIPSY	12564	22.72	5	616.308	1	25.52	19600000	615.302	-2.1
HLPSY	12564	22.72	5	616.308	1	25.52	19600000	615.302	-2.1
HLPSY	12564	22.72	5	616.308	1	25.52	19600000	615.302	-2.1
SMSTIH	4914	22.68	6	675.312	1	10.35	10900000	674.306	-2
SMSTIH	4914	22.68	6	675.312	1	10.35	10900000	674.306	-2
SKRPTISN	3164	22.67	8	451.755	2	7.46	15900000	901.498	-1.9
LSLPK	14550	22.58	5	557.364	1	29.59	35000000	556.358	-2.7
ISLPK	14550	22.58	5	557.364	1	29.59	35000000	556.358	-2.7
ISLPK	14550	22.58	5	557.364	1	29.59	35000000	556.358	-2.7
LSLPK	14550	22.58	5	557.364	1	29.59	35000000	556.358	-2.7
LSIPK	14550	22.58	5	557.364	1	29.59	35000000	556.358	-2.7
LSLPK	14550	22.58	5	557.364	1	29.59	35000000	556.358	-2.7
LSLPK	14550	22.58	5	557.364	1	29.59	35000000	556.358	-2.7
LSIPK	14550	22.58	5	557.364	1	29.59	35000000	556.358	-2.7
ISLPK	14550	22.58	5	557.364	1	29.59	35000000	556.358	-2.7
NKNPF	8351	22.55	5	619.318	1	17.18	3450000000	618.313	-2.4
NKNPF	8351	22.55	5	619.318	1	17.18	3450000000	618.313	-2.4
AHELPR	3891	22.35	6	361.7	2	8.62	23000000	721.387	-1.5
TFVSPR	9169	22.28	6	706.386	1	18.77	201000000	705.381	-3
TVAPPR	5352	22.24	6	640.375	1	11.18	101000000	639.37	-3.5
AFGGI	24290	22.1	5	464.25	1	50.21	82500000	463.243	-0.8
AFGGI	24290	22.1	5	464.25	1	50.21	82500000	463.243	-0.8
AFGGI	24290	22.1	5	464.25	1	50.21	82500000	463.243	-0.8
SPYPR	4586	22.1	5	619.318	1	9.78	39200000	618.312	-2.8
THINI	12849	21.85	5	597.334	1	26.1	12000000	596.328	-2.7
THINI	12849	21.85	5	597.334	1	26.1	12000000	596.328	-2.7
THLNL	12849	21.85	5	597.334	1	26.1	12000000	596.328	-2.7
THLNL	12849	21.85	5	597.334	1	26.1	12000000	596.328	-2.7
THINI	12849	21.85	5	597.334	1	26.1	12000000	596.328	-2.7
DFPPR	14333	21.82	5	631.318	1	29.12	10400000	630.312	-2
SVLHPI	18240	21.77	6	665.396	1	37.21	259000000	664.391	-2.6
SVLHPI	18240	21.77	6	665.396	1	37.21	259000000	664.391	-2.6
SVLHPL	18240	21.77	6	665.396	1	37.21	259000000	664.391	-2.6
PFPRPQPR	9674	21.74	8	332.19	3	19.79	949000000	993.551	-2.2
SIPTKPL	9697	21.71	7	755.463	1	19.84	1790000000	754.459	-3.5
VTLPK	12103	21.69	5	557.365	1	24.58	23800000	556.358	-1.7
VTLPK	12103	21.69	5	557.365	1	24.58	23800000	556.358	-1.7
AGLGHAPI	17134	21.64	8	368.21	2	34.92	392000000	734.408	-1.9
SHELPR	3814	21.56	6	369.697	2	8.49	11300000	737.382	-2.5
PGAPW	38633	21.5	5	527.26	1	83.33	34600000	526.254	-1.6
PGAPW	38633	21.5	5	527.26	1	83.33	34600000	526.254	-1.6
IVNHLPK	7443	21.46	7	410.755	2	15.34	126000000	819.497	-2.3
GNGIGF	22835	21.43	6	564.277	1	47.11	43900000	563.27	-1.8
YSPYPR	10361	21.18	6	782.38	1	21.19	18000000	781.376	-3.5
SFNNGPF	29446	21.17	7	782.343	1	61.58	16700000	781.34	-4.6
RGDVVPK	3461	21.06	7	257.488	3	7.91	29200000	769.445	-2.5
ALGQIKPL	26628	21	8	839.531	1	55.28	19400000	838.528	-4.3
LGGAFAPKPS	16693	20.94	10	472.763	2	34.01	13300000	943.513	-1.4
VGIPR	8640	20.91	5	541.345	1	17.75	11900000	540.338	-0.9
VGLPR	8640	20.91	5	541.345	1	17.75	11900000	540.338	-0.9
LALPW	46095	20.86	5	599.354	1	102.46	25400000	598.348	-2.2
EFPPR	9273	20.79	5	645.334	1	18.96	623000000	644.328	-2.2
EFPPR	9273	20.79	5	645.334	1	18.96	623000000	644.328	-2.2
TLGAR	14031	20.67	5	517.313	1	28.5	178000000	516.302	7.2
TLGAR	14031	20.67	5	517.313	1	28.5	178000000	516.302	7.2
C(+57.02)LFDRQC(+57.02)	18161	20.64	7	499.712	2	37.04	13200000	997.411	-1.4
INDLK	9980	20.49	5	602.361	1	20.42	13200000	601.343	16.7
LNDLK	9980	20.49	5	602.361	1	20.42	13200000	601.343	16.7
INDLK	9980	20.49	5	602.361	1	20.42	13200000	601.343	16.7
LNDLK	9980	20.49	5	602.361	1	20.42	13200000	601.343	16.7
LNDLK	9980	20.49	5	602.361	1	20.42	13200000	601.343	16.7
GIGGALPPK	14270	20.4	9	405.247	2	28.99	63600000	808.481	-1.4
TLKYPIEH	15097	20.4	8	500.776	2	30.71	10300000	999.539	-1.6
NGIYSPH	8964	20.34	7	787.371	1	18.39	130000000	786.366	-2.4
NGIYSPH	8964	20.34	7	787.371	1	18.39	130000000	786.366	-2.4
IFPGC(+57.02)PST	23989	20.06	8	878.405	1	49.57	15700000	877.4	-2.8
IFPGC(+57.02)PST	23989	20.06	8	878.405	1	49.57	15700000	877.4	-2.8
HLLPK	4365	20.05	5	304.199	2	9.4	32400000	606.385	-3.1
HILPK	4365	20.05	5	304.199	2	9.4	32400000	606.385	-3.1
HILPK	4365	20.05	5	304.199	2	9.4	32400000	606.385	-3.1
HIIPK	4365	20.05	5	304.199	2	9.4	32400000	606.385	-3.1
SISPY	13789	20	5	566.281	1	28.01	690000000	565.275	-1.6
SLSPY	13789	20	5	566.281	1	28.01	690000000	565.275	-1.6
SLSPY	13789	20	5	566.281	1	28.01	690000000	565.275	-1.6
SISPY	13789	20	5	566.281	1	28.01	690000000	565.275	-1.6
SLSPY	13789	20	5	566.281	1	28.01	690000000	565.275	-1.6
NAM(+15.99)FVPH	12298	19.98	7	831.378	1	24.98	112000000	830.375	-5.2
NNNGPPKLS	7900	19.83	9	470.745	2	16.28	16100000	939.477	-1.3
QFPFPRPP	37559	19.82	8	493.265	2	80.65	337000000	984.518	-2
LVRPPK	3916	19.82	6	355.239	2	8.65	10600000	708.465	-1.9
PTKPI	9702	19.79	5	555.349	1	19.85	111000000	554.343	-1.5
PTKPI	9702	19.79	5	555.349	1	19.85	111000000	554.343	-1.5
PTKPL	9702	19.79	5	555.349	1	19.85	111000000	554.343	-1.5
PTKPL	9702	19.79	5	555.349	1	19.85	111000000	554.343	-1.5
PTKPI	9702	19.79	5	555.349	1	19.85	111000000	554.343	-1.5
PTKPI	9702	19.79	5	555.349	1	19.85	111000000	554.343	-1.5
IISSPY	20792	19.79	6	679.366	1	42.65	16600000	678.359	0.1
QAALQTPKG	8349	19.61	9	457.257	2	17.17	11300000	912.503	-2.6
MIPTKPM	16544	19.6	7	817.43	1	33.71	186000000	816.424	-1.1
LRHNIGQT	3943	19.59	8	938.514	1	8.69	230000000	937.509	-2.7
ALRVPSGTT	13902	19.56	9	451.258	2	28.24	102000000	900.503	-1.9
SLKGGL	4800	19.53	6	574.354	1	10.15	80400000	573.349	-2.6
VFVVPPGHP	27363	19.53	9	474.768	2	56.88	34800000	947.523	-2
IETWNPN	22148	19.44	7	873.408	1	45.6	11000000	872.403	-2.7
IETWNPN	22148	19.44	7	873.408	1	45.6	11000000	872.403	-2.7
RYPNDPY	13332	19.3	7	924.419	1	27.04	11100000	923.414	-2.3
LSSPY	13544	19.27	5	566.281	1	27.5	690000000	565.275	-1.4
ISSPY	13544	19.27	5	566.281	1	27.5	690000000	565.275	-1.4
KYGSPK	4721	19.25	6	679.373	1	10.01	19600000	678.37	-6.2
TNPTKPI	6656	19.21	7	770.438	1	13.67	13800000	769.433	-3.7
VAGPF	33433	19.2	5	490.266	1	70.68	11500000	489.259	-0.6
PRPQPR	9931	19.17	6	375.722	2	20.33	12900000	749.43	-1
FNLGK	11220	19.03	5	578.328	1	22.9	87700000	577.322	-2.2
FNIGK	11220	19.03	5	578.328	1	22.9	87700000	577.322	-2.2
FNIGK	11220	19.03	5	578.328	1	22.9	87700000	577.322	-2.2
IMNRPT	5319	18.97	6	731.384	1	11.12	16100000	730.38	-4.3
SAGLHGWA	20153	18.87	8	399.697	2	41.28	10700000	797.382	-2.3
LVPPK	5795	18.86	5	553.37	1	12.05	21500000	552.364	-1.1
LVPPK	5795	18.86	5	553.37	1	12.05	21500000	552.364	-1.1
IVPPK	5795	18.86	5	553.37	1	12.05	21500000	552.364	-1.1
LVPPK	5795	18.86	5	553.37	1	12.05	21500000	552.364	-1.1
LVPPK	5795	18.86	5	553.37	1	12.05	21500000	552.364	-1.1
IVPPK	5795	18.86	5	553.37	1	12.05	21500000	552.364	-1.1
RSRDPIYS	6208	18.84	8	497.258	2	12.84	231000000	992.504	-1.7
YLVNPH	12389	18.81	6	742.386	1	25.17	173000000	741.381	-2.9
QLHVPR	12623	18.8	6	375.224	2	25.64	30700000	748.434	-2.6
KIGSVI	8065	18.75	6	616.401	1	16.6	36200000	615.395	-2.5
DKNPF	13166	18.71	5	620.302	1	26.72	63400000	619.297	-2.7
KNNNPF	9496	18.68	6	733.361	1	19.42	29300000	732.356	-2.4
KNNNPF	9496	18.68	6	733.361	1	19.42	29300000	732.356	-2.4
PPGHP	7147	18.65	5	504.256	1	14.75	212000000	503.249	-1.2
PPGHP	7147	18.65	5	504.256	1	14.75	212000000	503.249	-1.2
TVLPK	12609	18.62	5	557.364	1	25.61	23800000	556.358	-3
LPHFNS	17446	18.58	6	714.355	1	35.59	74400000	713.35	-3.4
LPHFNS	17446	18.58	6	714.355	1	35.59	74400000	713.35	-3.4
GPFPI	34922	18.58	5	530.296	1	74.25	19600000	529.29	-1.8
GPFPI	34922	18.58	5	530.296	1	74.25	19600000	529.29	-1.8
VYIPR	13798	18.5	5	647.386	1	28.02	10500000	646.38	-2.5
VYLPR	13798	18.5	5	647.386	1	28.02	10500000	646.38	-2.5
VYLPR	13798	18.5	5	647.386	1	28.02	10500000	646.38	-2.5
VYLPR	13798	18.5	5	647.386	1	28.02	10500000	646.38	-2.5
VYIPR	13798	18.5	5	647.386	1	28.02	10500000	646.38	-2.5
VYIPR	13798	18.5	5	647.386	1	28.02	10500000	646.38	-2.5
VYIPR	13798	18.5	5	647.386	1	28.02	10500000	646.38	-2.5
PFPRPR	7518	18.39	6	257.153	3	15.5	98900000	768.439	-1.6
ISSLPR	12661	18.36	6	672.402	1	25.72	59500000	671.397	-2.4
LSSLPR	12661	18.36	6	672.402	1	25.72	59500000	671.397	-2.4
IMGPL	34714	18.33	5	530.296	1	73.74	19600000	529.293	-8.3
LMGPI	34714	18.33	5	530.296	1	73.74	19600000	529.293	-8.3
IMGPL	34714	18.33	5	530.296	1	73.74	19600000	529.293	-8.3
WEAGKPL	20496	18.29	7	800.427	1	42.03	65100000	799.423	-3.9
WEAGKPL	20496	18.29	7	800.427	1	42.03	65100000	799.423	-3.9
WEAGKPL	20496	18.29	7	800.427	1	42.03	65100000	799.423	-3.9
AIPVNKPG	8570	18.27	8	795.47	1	17.62	13000000	794.465	-3
AIPVNKPG	8570	18.27	8	795.47	1	17.62	13000000	794.465	-3
LGQIKPL	22417	18.26	7	384.752	2	46.19	20900000	767.49	-1.5
LGQLKPL	22417	18.26	7	384.752	2	46.19	20900000	767.49	-1.5
VGVIK	5755	18.17	5	258.181	2	11.96	12300000	514.348	-1.2
VGVIK	5755	18.17	5	258.181	2	11.96	12300000	514.348	-1.2
VGVIK	5755	18.17	5	258.181	2	11.96	12300000	514.348	-1.2
FPFPR	27418	18.07	5	332.183	2	57.02	15600000	662.354	-2.6
FPFPR	27418	18.07	5	332.183	2	57.02	15600000	662.354	-2.6
NGVPIGPR	12065	18.04	8	405.234	2	24.51	11000000	808.456	-2.3
KFPPPHV	12141	17.94	7	821.465	1	24.67	189000000	820.46	-2.5
KYDSVHG	3225	17.93	7	403.195	2	7.55	17500000	804.377	-2.1
IVGTLGPK	12421	17.93	8	392.749	2	25.23	14200000	783.485	-2.3
SLPHPQ	6904	17.89	6	678.355	1	14.22	55900000	677.35	-3
FTSPL	28261	17.86	5	564.302	1	58.95	19100000	563.295	-1.5
FTSPI	28261	17.86	5	564.302	1	58.95	19100000	563.295	-1.5
FTSPL	28261	17.86	5	564.302	1	58.95	19100000	563.295	-1.5
FTSPL	28261	17.86	5	564.302	1	58.95	19100000	563.295	-1.5
LASPR	3394	17.81	5	543.324	1	7.81	55000000	542.318	-1.5
LASPR	3394	17.81	5	543.324	1	7.81	55000000	542.318	-1.5
IASPR	3394	17.81	5	543.324	1	7.81	55000000	542.318	-1.5
LASPR	3394	17.81	5	543.324	1	7.81	55000000	542.318	-1.5
LASPR	3394	17.81	5	543.324	1	7.81	55000000	542.318	-1.5
LASPR	3394	17.81	5	543.324	1	7.81	55000000	542.318	-1.5
IKEKLPGGH	5632	17.79	9	489.79	2	11.72	45200000	977.566	-1.3
ALRAPL	18442	17.75	6	320.71	2	37.61	28800000	639.407	-1.9
SVFPL	39928	17.75	5	562.322	1	86.57	27700000	561.316	-2.3
SVFPL	39928	17.75	5	562.322	1	86.57	27700000	561.316	-2.3
SVFPL	39928	17.75	5	562.322	1	86.57	27700000	561.316	-2.3
SVFPL	39928	17.75	5	562.322	1	86.57	27700000	561.316	-2.3
RAPPL	6749	17.74	5	553.345	1	13.84	10000000	552.338	-1
RAPPL	6749	17.74	5	553.345	1	13.84	10000000	552.338	-1
FAIGI	40783	17.72	5	520.312	1	88.75	117000000	519.306	-1.7
FALGI	40783	17.72	5	520.312	1	88.75	117000000	519.306	-1.7
FALGI	40783	17.72	5	520.312	1	88.75	117000000	519.306	-1.7
SSSPPR	15445	17.7	6	315.665	2	31.43	11300000	629.313	4.1
SKRPTISNG	3311	17.69	9	480.266	2	7.68	23300000	958.52	-1.6
ISPAPR	5584	17.65	6	320.692	2	11.63	98100000	639.37	-1.8
TLPALRQF	34785	17.65	8	473.279	2	73.92	11000000	944.544	-2
TLPALRQF	34785	17.65	8	473.279	2	73.92	11000000	944.544	-2
IYPGC(+57.02)PST	15934	17.62	8	894.401	1	32.45	15500000	893.395	-2.2
ENLASPR	5380	17.41	7	393.709	2	11.23	93300000	785.403	-0.1
ENIASPR	5380	17.41	7	393.709	2	11.23	93300000	785.403	-0.1
NATFPRPT	14299	17.4	8	452.237	2	29.05	15700000	902.461	-1.8
VGVPK	4810	17.39	5	250.165	2	10.17	20400000	498.317	-1.9
VGVPK	4810	17.39	5	250.165	2	10.17	20400000	498.317	-1.9
LDQMPR	8649	17.37	6	380.194	2	17.77	68100000	758.375	-2.3
TIVPR	6684	17.36	5	585.37	1	13.73	10900000	584.365	-2.5
TIVPR	6684	17.36	5	585.37	1	13.73	10900000	584.365	-2.5
TLVPR	6684	17.36	5	585.37	1	13.73	10900000	584.365	-2.5
TLVPR	6684	17.36	5	585.37	1	13.73	10900000	584.365	-2.5
TLVPR	6684	17.36	5	585.37	1	13.73	10900000	584.365	-2.5
LSVISPK	15215	17.33	7	372.236	2	30.94	37200000	742.459	-2.6
ITLPK	11285	17.32	5	571.381	1	23.04	16600000	570.374	-0.7
ITIPK	11285	17.32	5	571.381	1	23.04	16600000	570.374	-0.7
LTIPK	11285	17.32	5	571.381	1	23.04	16600000	570.374	-0.7
LLGMI	18367	17.29	5	546.339	1	37.46	15800000	545.325	13.3
LLGML	18367	17.29	5	546.339	1	37.46	15800000	545.325	13.3
LLGMI	18367	17.29	5	546.339	1	37.46	15800000	545.325	13.3
LLGML	18367	17.29	5	546.339	1	37.46	15800000	545.325	13.3
LLGML	18367	17.29	5	546.339	1	37.46	15800000	545.325	13.3
IIGML	18367	17.29	5	546.339	1	37.46	15800000	545.325	13.3
LLGMI	18367	17.29	5	546.339	1	37.46	15800000	545.325	13.3
LIGML	18367	17.29	5	546.339	1	37.46	15800000	545.325	13.3
LIGML	18367	17.29	5	546.339	1	37.46	15800000	545.325	13.3
IIGMI	18367	17.29	5	546.339	1	37.46	15800000	545.325	13.3
ILGML	18367	17.29	5	546.339	1	37.46	15800000	545.325	13.3
LIGML	18367	17.29	5	546.339	1	37.46	15800000	545.325	13.3
LRQNIGQN	5165	17.25	8	942.507	1	10.8	17000000	941.504	-4.5
SEIKDPK	3358	17.16	7	816.455	1	7.75	333000000	815.439	10.3
TLPALR	16694	17.16	6	335.715	2	34.01	11000000	669.417	-2
SRNPI	5021	17.15	5	586.33	1	10.53	247000000	585.323	-1.7
TVAAR	23320	17.13	5	517.313	1	48.15	164000000	516.302	7
TVAAR	23320	17.13	5	517.313	1	48.15	164000000	516.302	7
LLLPR	20644	17.12	5	306.215	2	42.35	19200000	610.417	-2.3
LLLPR	20644	17.12	5	306.215	2	42.35	19200000	610.417	-2.3
IILPR	20644	17.12	5	306.215	2	42.35	19200000	610.417	-2.3
LLIPR	20644	17.12	5	306.215	2	42.35	19200000	610.417	-2.3
LLLPR	20644	17.12	5	306.215	2	42.35	19200000	610.417	-2.3
LLLPR	20644	17.12	5	306.215	2	42.35	19200000	610.417	-2.3
LLLPR	20644	17.12	5	306.215	2	42.35	19200000	610.417	-2.3
LIIPR	20644	17.12	5	306.215	2	42.35	19200000	610.417	-2.3
LLLPR	20644	17.12	5	306.215	2	42.35	19200000	610.417	-2.3
LLLPR	20644	17.12	5	306.215	2	42.35	19200000	610.417	-2.3
HAFPL	23105	17.11	5	584.319	1	47.7	25700000	583.312	-0.5
RADLPGVK	9053	17.08	8	428.255	2	18.56	48500000	854.497	-1.1
ITGGF	17709	17.08	5	494.262	1	36.12	15500000	493.254	2.1
ITGGF	17709	17.08	5	494.262	1	36.12	15500000	493.254	2.1
LTGGF	17709	17.08	5	494.262	1	36.12	15500000	493.254	2.1
LPPGPSPL	9727	17.03	8	777.445	1	19.91	13000000	776.443	-6.6
KNNPF	9736	16.99	5	310.163	2	19.93	2700000000	618.313	-2
KNNPF	9736	16.99	5	310.163	2	19.93	2700000000	618.313	-2
IFPGC(+57.02)PS	22594	16.99	7	777.357	1	46.59	46500000	776.353	-3.2
IYPGC(+57.02)PS	13922	16.97	7	793.352	1	28.28	45800000	792.348	-3.1
SLAPLVPR	25561	16.9	8	426.768	2	52.97	14100000	851.523	-2.6
SVIPF	24994	16.88	5	562.322	1	51.7	15900000	561.316	-2.5
SYTPI	18195	16.75	5	580.297	1	37.11	25000000	579.29	-1.8
SYTPI	18195	16.75	5	580.297	1	37.11	25000000	579.29	-1.8
SYTPL	18195	16.75	5	580.297	1	37.11	25000000	579.29	-1.8
WEPNKPL	22862	16.62	7	442.236	2	47.17	18400000	882.46	-2.2
WEPNKPL	22862	16.62	7	442.236	2	47.17	18400000	882.46	-2.2
RVPSGTT	3065	16.6	7	717.387	1	7.3	102000000	716.382	-3.3
MVPTKPM	12333	16.6	7	402.211	2	25.05	73200000	802.408	-1.7
LARPVL	19286	16.51	6	334.726	2	39.44	14900000	667.438	-2
LARPVL	19286	16.51	6	334.726	2	39.44	14900000	667.438	-2
LARPVL	19286	16.51	6	334.726	2	39.44	14900000	667.438	-2
LARPVL	19286	16.51	6	334.726	2	39.44	14900000	667.438	-2
KGGPVI	6024	16.49	6	570.361	1	12.48	102000000	569.354	-0.8
YSNNFG	12349	16.45	6	701.287	1	25.08	11400000	700.282	-2.9
IILSF	21316	16.42	5	592.38	1	43.78	104000000	591.363	16.9
ILLSF	21316	16.42	5	592.38	1	43.78	104000000	591.363	16.9
ILLSF	21316	16.42	5	592.38	1	43.78	104000000	591.363	16.9
LILSF	21316	16.42	5	592.38	1	43.78	104000000	591.363	16.9
LLLSF	21316	16.42	5	592.38	1	43.78	104000000	591.363	16.9
LLISF	21316	16.42	5	592.38	1	43.78	104000000	591.363	16.9
ILLSF	21316	16.42	5	592.38	1	43.78	104000000	591.363	16.9
LILSF	21316	16.42	5	592.38	1	43.78	104000000	591.363	16.9
IIISF	21316	16.42	5	592.38	1	43.78	104000000	591.363	16.9
IIISF	21316	16.42	5	592.38	1	43.78	104000000	591.363	16.9
ILISF	21316	16.42	5	592.38	1	43.78	104000000	591.363	16.9
LLLSF	21316	16.42	5	592.38	1	43.78	104000000	591.363	16.9
LLLSF	21316	16.42	5	592.38	1	43.78	104000000	591.363	16.9
LLLSF	21316	16.42	5	592.38	1	43.78	104000000	591.363	16.9
LLLSF	21316	16.42	5	592.38	1	43.78	104000000	591.363	16.9
IILSF	21316	16.42	5	592.38	1	43.78	104000000	591.363	16.9
ILISF	21316	16.42	5	592.38	1	43.78	104000000	591.363	16.9
ILLSF	21316	16.42	5	592.38	1	43.78	104000000	591.363	16.9
LLLSF	21316	16.42	5	592.38	1	43.78	104000000	591.363	16.9
GLVSF	33174	16.33	5	522.291	1	70.1	15300000	521.285	-1.4
GIVSF	33174	16.33	5	522.291	1	70.1	15300000	521.285	-1.4
LVFC(+57.02)PQ	27708	16.25	6	763.378	1	57.67	21600000	762.373	-3.8
NSIGF	21697	16.25	5	537.266	1	44.63	16400000	536.26	-0.6
NSLGF	21697	16.25	5	537.266	1	44.63	16400000	536.26	-0.6
NSIGF	21697	16.25	5	537.266	1	44.63	16400000	536.26	-0.6
NSLGF	21697	16.25	5	537.266	1	44.63	16400000	536.26	-0.6
NSIGF	21697	16.25	5	537.266	1	44.63	16400000	536.26	-0.6
FVVPPG	26198	16.22	6	615.349	1	54.33	65600000	614.343	-1.8
FVVPPG	26198	16.22	6	615.349	1	54.33	65600000	614.343	-1.8
GVNPTY	11224	16.19	6	650.312	1	22.9	11600000	649.307	-3.1
ALQTPKG	5745	16.14	7	714.413	1	11.94	13100000	713.407	-2.5
AILPW	45907	16.07	5	599.354	1	101.96	25400000	598.348	-2.4
KDGAISW	12354	16.06	7	776.391	1	25.09	94700000	775.386	-3.7
EKLPGGH	3983	16.04	7	737.392	1	8.76	16900000	736.387	-3.3
GIGPF	26673	16.02	5	490.267	1	55.38	18200000	489.259	2
NLRQSQV	6259	16.01	7	422.735	2	12.92	16300000	843.456	-1.9
NAMFVP	33777	15.98	6	678.325	1	71.45	34600000	677.321	-4.7
TLNRNGL	9412	15.97	7	394.224	2	19.24	16100000	786.435	-1.4
TLNRNGL	9412	15.97	7	394.224	2	19.24	16100000	786.435	-1.4
PFPPR	14772	15.91	5	307.176	2	30.07	1240000000	612.338	-2.1
PFPPR	14772	15.91	5	307.176	2	30.07	1240000000	612.338	-2.1
VATIK	7545	15.89	5	531.35	1	15.56	14000000	530.343	-1.1
LGAPY	18675	15.85	5	520.276	1	38.13	18500000	519.269	-1.1
SNLGF	21930	15.83	5	537.266	1	45.13	16400000	536.26	-1.4
FGTGL	17455	15.82	5	494.26	1	35.61	15500000	493.254	-1
GEIPRPR	6347	15.8	7	412.739	2	13.08	110000000	823.466	-2.6
TLILK	7424	15.75	5	294.209	2	15.31	28800000	586.405	-2.6
TLLLK	7424	15.75	5	294.209	2	15.31	28800000	586.405	-2.6
TLLLK	7424	15.75	5	294.209	2	15.31	28800000	586.405	-2.6
TILIK	7424	15.75	5	294.209	2	15.31	28800000	586.405	-2.6
TILLK	7424	15.75	5	294.209	2	15.31	28800000	586.405	-2.6
TIIIK	7424	15.75	5	294.209	2	15.31	28800000	586.405	-2.6
TLLLK	7424	15.75	5	294.209	2	15.31	28800000	586.405	-2.6
TILLK	7424	15.75	5	294.209	2	15.31	28800000	586.405	-2.6
TLLLK	7424	15.75	5	294.209	2	15.31	28800000	586.405	-2.6
TLIIK	7424	15.75	5	294.209	2	15.31	28800000	586.405	-2.6
TLLLK	7424	15.75	5	294.209	2	15.31	28800000	586.405	-2.6
TLIIK	7424	15.75	5	294.209	2	15.31	28800000	586.405	-2.6
TIIIK	7424	15.75	5	294.209	2	15.31	28800000	586.405	-2.6
GSNRFET	6276	15.58	7	405.69	2	12.95	106000000	809.367	-2.4
GVIPR	8481	15.5	5	271.176	2	17.45	66100000	540.338	-1.6
GVLPR	8481	15.5	5	271.176	2	17.45	66100000	540.338	-1.6
GVIPR	8481	15.5	5	271.176	2	17.45	66100000	540.338	-1.6
GVIPR	8481	15.5	5	271.176	2	17.45	66100000	540.338	-1.6
GVLPR	8481	15.5	5	271.176	2	17.45	66100000	540.338	-1.6
ILNRPTLS	18045	15.48	8	457.276	2	36.81	53500000	912.539	-2
ILNRPTIS	18045	15.48	8	457.276	2	36.81	53500000	912.539	-2
ILNRPTLS	18045	15.48	8	457.276	2	36.81	53500000	912.539	-2
ILNRPTLS	18045	15.48	8	457.276	2	36.81	53500000	912.539	-2
FVVPP	27753	15.38	5	558.328	1	57.77	17500000	557.321	-1.1
FVVPP	27753	15.38	5	558.328	1	57.77	17500000	557.321	-1.1
FVVPP	27753	15.38	5	558.328	1	57.77	17500000	557.321	-1.1
FVVPP	27753	15.38	5	558.328	1	57.77	17500000	557.321	-1.1
LRPPFP	28838	15.34	6	363.717	2	60.24	201000000	725.422	-2.6
KNDPF	12926	15.31	5	310.654	2	26.24	44200000	619.297	-3.3
KGSIPGVT	12160	15.29	8	758.438	1	24.7	51100000	757.433	-3.2
KGSIPGVT	12160	15.29	8	758.438	1	24.7	51100000	757.433	-3.2
PHIGL	16255	15.12	5	268.663	2	33.12	11300000	535.312	-2.4
PHIGI	16255	15.12	5	268.663	2	33.12	11300000	535.312	-2.4
PHIGL	16255	15.12	5	268.663	2	33.12	11300000	535.312	-2.4
GHAPI	4632	15.03	5	247.639	2	9.86	82000000	493.265	-2.7
GLTPY	17627	15.03	5	550.287	1	35.95	41300000	549.28	-0.6
GITPY	17627	15.03	5	550.287	1	35.95	41300000	549.28	-0.6
GLTPY	17627	15.03	5	550.287	1	35.95	41300000	549.28	-0.6
SGFAPF	27382	15.02	6	625.296	1	56.92	29400000	624.291	-3.2
Total peptides in purified ESPro F3 fraction
Peptide	Scan	Score	length	m/z	z	RT	Area	Mass	ppm
KDFPPR	11428	99	6	380.211	2	17.42	14300000	758.408	-1.3
YLGPK	9047	99	5	577.334	1	13.79	48200000	576.327	0
DFYNPK	15353	99	6	783.366	1	23.43	232000000	782.36	-1.6
WGPL	30735	99	4	472.255	1	47.05	30400000	471.248	-0.6
LVPR	6837	99	4	242.666	2	10.43	79700000	483.317	-0.6
KDFPPR	10420	99	6	380.211	2	15.88	24800000	758.408	-0.6
LSAPPR	8446	99	6	320.692	2	12.88	56300000	639.37	-0.3
DFYNPK	15006	99	6	783.367	1	22.9	232000000	782.36	-0.6
LSAPPR	8088	99	6	320.692	2	12.33	56300000	639.37	-1.5
LSPK	8320	99	4	444.281	1	12.68	57900000	443.274	-0.3
LLPR	9026	99	4	249.673	2	13.76	93900000	497.333	-0.1
FLVPR	19283	99	5	316.2	2	29.47	13200000	630.385	-0.8
VSVPK	8524	99	5	529.335	1	12.99	39700000	528.327	1.6
LLPR	9704	99	4	249.673	2	14.8	86000000	497.333	-0.5
KFPPPK	5907	99	6	357.22	2	9.02	51100000	712.427	-1.3
VVFPR	16134	99	5	309.192	2	24.63	19600000	616.37	-0.4
FVNPK	7807	99	5	604.345	1	11.91	18300000	603.338	-0.2
LVPR	6888	99	4	484.324	1	10.51	17100000	483.317	0.1
EGGLKLPR	14493	99	8	435.264	2	22.11	67200000	868.513	0.5
FVNPK	7786	99	5	604.345	1	11.88	18300000	603.338	0
KFPPPK	6911	99	6	357.221	2	10.55	140000000	712.427	-0.4
LLPR	7978	99	4	249.673	2	12.17	62900000	497.333	-0.3
LLPK	8784	98	4	235.671	2	13.39	16300000	469.326	1
SPYPR	7503	98	5	310.163	2	11.45	76300000	618.313	-0.3
YLGPK	9015	98	5	289.171	2	13.75	88300000	576.327	-0.3
KDFPPR	6150	98	6	380.211	2	9.39	16500000	758.408	-1.4
YNPK	15280	98	4	521.272	1	23.32	18200000	520.264	1
SVLSPK	8382	98	6	630.381	1	12.78	339000000	629.375	-0.9
FVPK	7129	98	4	490.303	1	10.88	25600000	489.295	0.2
PFPR	15458	98	4	516.293	1	23.59	28200000	515.286	0
VSLPR	12750	98	5	286.182	2	19.45	18600000	570.349	-0.9
VGPF	23099	98	4	419.228	1	35.34	10500000	418.222	-1.1
KLPL	16415	98	4	470.334	1	25.06	12600000	469.326	0.2
DFYNPK	17117	98	6	392.187	2	26.14	24600000	782.36	-0.7
LATQPR	6138	98	6	343.203	2	9.37	43900000	684.392	-1.4
KFPPPK	7247	98	6	357.221	2	11.06	140000000	712.427	-1
TTLLPR	14023	98	6	350.721	2	21.39	24100000	699.428	-0.1
YNPK	15073	98	4	521.272	1	23	18200000	520.264	0.3
LEWPK	21087	98	5	336.689	2	32.24	11400000	671.364	-0.9
LEWPK	21423	98	5	336.689	2	32.76	11400000	671.364	-1.5
LLPR	7998	98	4	498.34	1	12.2	14600000	497.333	0
KNPF	11300	98	4	505.277	1	17.23	43400000	504.27	0.7
GELRPPR	8675	98	7	275.496	3	13.22	46600000	823.466	0.1
VGPF	23166	98	4	419.229	1	35.44	10500000	418.222	-0.5
FLVPR	18949	98	5	316.2	2	28.96	13200000	630.385	0.7
TVLLPR	17289	98	6	349.731	2	26.4	25800000	697.449	-0.2
KLPL	16760	98	4	470.334	1	25.59	12600000	469.326	0.2
PFPR	15106	98	4	516.293	1	23.05	28200000	515.286	0.6
WGPL	30718	98	4	472.255	1	47.03	30400000	471.248	-0.4
LLPR	9368	98	4	249.674	2	14.28	93900000	497.333	0.2
KDFPPR	10066	98	6	380.211	2	15.34	24800000	758.408	-0.9
KTNDRPSGL	7395	97	9	494.264	2	11.29	188000000	986.514	-0.1
LVPPK	8260	97	5	553.371	1	12.59	31000000	552.364	0.5
KFPPPK	6242	97	6	357.22	2	9.53	51100000	712.427	-1.6
STRPF	11188	97	5	304.163	2	17.05	10900000	606.313	-0.9
KLPL	14917	97	4	470.334	1	22.76	13400000	469.326	-0.1
AFGLK	14980	97	5	268.165	2	22.86	12300000	534.317	-0.5
LVPPK	8613	97	5	553.371	1	13.13	31000000	552.364	0.2
LLRPPK	8426	97	6	362.247	2	12.84	25300000	722.48	-0.5
LLPR	7996	97	4	249.673	2	12.2	62900000	497.333	-0.5
SSTVRTW	6476	97	7	418.716	2	9.89	11300000	835.419	-0.7
PFPPR	15417	97	5	613.345	1	23.53	85000000	612.338	-0.4
PFPPR	15753	97	5	613.345	1	24.04	85000000	612.338	-0.5
PFPPR	15374	97	5	307.176	2	23.46	1710000000	612.338	0.1
KFPPPK	6575	97	6	357.22	2	10.04	140000000	712.427	-2.2
LSAPPR	8783	97	6	320.692	2	13.39	56300000	639.37	0
VSLPR	12710	97	5	286.182	2	19.39	18600000	570.349	-0.8
SLGVKPPK	9347	97	8	413.263	2	14.25	13600000	824.512	-0.8
PFPR	15794	97	4	516.293	1	24.11	28200000	515.286	-0.7
FVNPK	7783	97	5	302.676	2	11.88	120000000	603.338	-1.9
PFPPR	15038	97	5	307.176	2	22.95	1710000000	612.338	-1.1
SVPK	8469	97	4	430.266	1	12.91	26900000	429.259	0.5
KDFPPR	6508	97	6	380.211	2	9.94	16500000	758.408	-1
PFPPR	15081	96	5	613.345	1	23.02	85000000	612.338	-0.8
PFPPR	15710	96	5	307.176	2	23.98	1710000000	612.338	0.3
VATVSLPR	18440	96	8	421.758	2	28.17	16500000	841.502	-0.8
YSPYPR	12185	96	6	391.695	2	18.58	10600000	781.376	-0.2
LKLEK	6957	96	5	315.712	2	10.62	14700000	629.411	-1.1
PFPFPPR	29423	96	7	429.237	2	45.05	25400000	856.46	-0.5
YSPY	14843	96	4	529.229	1	22.65	19200000	528.222	-0.3
RPSTY	6643	96	5	623.313	1	10.14	73400000	622.307	-1.9
KNPF	10956	96	4	505.277	1	16.7	43400000	504.27	0.5
ALQTPK	7793	96	6	657.392	1	11.89	200000000	656.386	-1.2
FPPPK	8886	96	5	293.173	2	13.55	41200000	584.332	-0.1
ALQTPK	7461	96	6	657.392	1	11.38	200000000	656.386	-1.8
PFPPR	16046	96	5	307.176	2	24.49	1710000000	612.338	-1.2
DFYNPK	15000	96	6	392.187	2	22.89	875000000	782.36	-0.8
KLTNL	11221	96	5	588.372	1	17.1	13000000	587.364	0.9
AHFPL	21392	96	5	584.319	1	32.71	12500000	583.312	-0.1
KDFPPR	7170	96	6	380.211	2	10.94	16500000	758.408	-0.3
HLVPR	6617	95	5	311.194	2	10.1	42900000	620.376	-2.7
FPPPK	8549	95	5	293.173	2	13.03	41200000	584.332	-0.9
QTPK	7746	95	4	473.272	1	11.82	21000000	472.264	0.1
FVPK	7125	95	4	245.655	2	10.87	72300000	489.295	-0.8
ELRPPR	7920	95	6	384.229	2	12.08	26700000	766.445	-0.7
ALQTPK	7751	95	6	329.2	2	11.83	546000000	656.386	-0.7
FPPPK	9916	95	5	293.173	2	15.11	24000000	584.332	-2
LQGFSR	13395	95	6	354.195	2	20.43	21300000	706.376	-0.8
PFPR	9872	95	4	258.65	2	15.05	35500000	515.286	-1.1
DFYNPK	15332	95	6	392.187	2	23.4	875000000	782.36	-0.3
FNLGK	13404	95	5	578.33	1	20.45	62700000	577.322	-0.2
PFRPPR	9474	95	6	385.227	2	14.44	55900000	768.439	-1.1
GELRPPR	8570	95	7	412.74	2	13.06	110000000	823.466	0.2
YVPW	31047	95	4	564.281	1	47.53	14700000	563.274	-1
HVLGPR	7609	95	6	339.706	2	11.61	12500000	677.397	-0.7
WTPL	29167	95	4	516.282	1	44.65	34000000	515.274	-0.1
VSLPK	11485	95	5	272.179	2	17.5	12600000	542.343	-0.4
FPPPK	9559	95	5	293.173	2	14.57	24000000	584.332	-0.6
FPPPK	10587	95	5	293.173	2	16.14	31500000	584.332	0
LQTPK	6955	94	5	293.681	2	10.62	45900000	585.349	-0.9
FVSPR	9300	94	5	303.173	2	14.18	19600000	604.333	-1.7
FVSPR	9319	94	5	303.173	2	14.21	19600000	604.333	-1.3
EGGLKLPR	14143	94	8	435.264	2	21.58	67200000	868.513	0.3
PFRPPQPR	10712	94	8	332.191	3	16.33	880000000	993.551	-0.4
FPPPK	9222	94	5	293.173	2	14.06	41200000	584.332	-2
VGVPK	7713	94	5	250.166	2	11.77	12900000	498.317	-0.2
LVGPR	7537	94	5	271.176	2	11.5	11000000	540.338	-0.7
PFRPPR	9620	94	6	257.154	3	14.67	172000000	768.439	-0.8
PFRPPQPR	10838	94	8	497.783	2	16.52	144000000	993.551	0
FPPPK	8216	94	5	293.173	2	12.53	41200000	584.332	-0.4
NKNPF	11531	93	5	619.32	1	17.58	691000000	618.313	-0.3
YVPW	31049	93	4	564.281	1	47.54	14700000	563.274	-1
QTPK	7580	93	4	473.272	1	11.56	21000000	472.264	0.2
YSGF	19956	93	4	473.203	1	30.5	44600000	472.196	0.3
AGPLRPL	17439	93	7	362.229	2	26.63	28300000	722.444	-0.8
DFYNPK	16785	93	6	392.187	2	25.63	24600000	782.36	-0.4
GAPY	10201	93	4	407.193	1	15.55	10900000	406.185	1.1
RVPL	11247	93	4	484.325	1	17.14	12200000	483.317	0.6
FGGL	21308	93	4	393.213	1	32.58	23300000	392.206	-0.7
FVPK	7481	93	4	245.655	2	11.42	72300000	489.295	0
PFPR	9615	93	4	258.65	2	14.66	35500000	515.286	-0.6
YLGPGK	9369	93	6	317.682	2	14.29	15000000	633.349	0.4
FSNW	25773	93	4	553.241	1	39.44	37900000	552.233	0.2
FGGL	21391	93	4	393.213	1	32.71	23300000	392.206	-0.7
FPPPK	10949	92	5	293.173	2	16.69	31500000	584.332	-1.5
PFHPK	19892	92	5	313.177	2	30.41	19800000	624.338	1.5
LRPL	12182	92	4	249.673	2	18.57	34200000	497.333	-0.2
FSGF	26529	92	4	457.208	1	40.6	10100000	456.201	-0.2
LVGPR	7586	92	5	271.176	2	11.58	11000000	540.338	-0.5
KLVL	14094	91	4	472.349	1	21.5	19400000	471.342	0.2
NPNNKPF	11006	91	7	415.711	2	16.78	250000000	829.408	0
WPGDLK	19557	91	6	358.192	2	29.89	13700000	714.37	-0.2
TVFPR	16254	91	5	310.181	2	24.81	14500000	618.349	-1.5
PFRPPR	9268	91	6	257.154	3	14.13	172000000	768.439	-0.6
LALPW	37824	91	5	599.355	1	57.92	17500000	598.348	-0.7
YSPM(+15.99)L	18604	91	5	626.28	1	28.42	601000000	625.278	-7.8
AYPF	26193	91	4	497.24	1	40.09	327000000	496.232	0.8
FPAGSPR	10798	91	7	366.195	2	16.46	153000000	730.376	-0.5
ELRPPR	7571	91	6	384.229	2	11.55	26700000	766.445	-1.1
LVNHLPK	9496	91	7	410.756	2	14.48	16000000	819.497	-0.1
PLNPR	7116	91	5	298.679	2	10.86	14100000	595.344	-1.9
VNKPPL	11810	91	6	334.211	2	18	12800000	666.406	0
LRPL	12648	90	4	249.673	2	19.29	12000000	497.333	-0.2
PFRPPR	9632	90	6	385.228	2	14.68	55900000	768.439	1.8
KDGLYSAY	8969	90	8	458.73	2	13.68	32600000	915.434	12.7
FGRDF	16336	90	5	321.156	2	24.94	18600000	640.297	0
SVFPSPK	16719	90	7	381.213	2	25.53	11400000	760.412	-1.3
PFPPR	16162	90	5	307.176	2	24.67	1710000000	612.338	0.4
PFPPR	16088	90	5	613.345	1	24.56	85000000	612.338	-1.3
YAGF	20516	90	4	457.208	1	31.36	59800000	456.201	0
YSPM(+15.99)L	18923	90	5	626.282	1	28.92	601000000	625.278	-5.7
SVLSPK	8030	90	6	630.381	1	12.25	339000000	629.375	-1.5
KVLL	13760	89	4	472.35	1	20.99	19400000	471.342	0.8
NLGK	13425	89	4	431.261	1	20.48	11000000	430.254	-0.7
LLNPTR	9312	89	6	713.429	1	14.2	25200000	712.423	-1.9
FNLGK	13467	89	5	289.668	2	20.54	198000000	577.322	-1.1
QGTPLFPR	21128	89	8	458.256	2	32.31	87800000	914.497	-0.2
PFPFPPR	29760	89	7	429.236	2	45.56	25400000	856.46	-1.2
NEPWWPK	28373	89	7	478.735	2	43.44	119000000	955.455	-0.1
LPVR	8034	89	4	242.666	2	12.25	91600000	483.317	0.5
WNPNDPK	12480	89	7	435.709	2	19.03	75000000	869.403	0.1
WNPDNPK	11460	89	7	435.708	2	17.47	55800000	869.403	-0.9
YHVSPK	7181	88	6	365.697	2	10.96	48700000	729.381	-1
SVLSPK	8717	88	6	315.695	2	13.29	13700000	629.375	-0.6
AGLVQRPL	17999	88	8	427.266	2	27.5	10100000	852.518	-0.7
SVLSPK	8037	88	6	315.695	2	12.26	541000000	629.375	-0.5
TFNLK	11808	88	5	311.681	2	18	11200000	621.349	-0.4
NEPWWPK	28709	88	7	478.734	2	43.95	119000000	955.455	-1.3
HSTRPF	8414	88	6	372.693	2	12.82	12300000	743.371	-0.9
LKSL	9847	88	4	460.313	1	15.01	60700000	459.306	0.3
KDKNPF	9667	88	6	374.703	2	14.74	16100000	747.391	0.1
LQGFSR	13393	88	6	354.195	2	20.43	21300000	706.376	-0.8
VGGFPR	13134	88	6	316.68	2	20.03	43500000	631.344	0.6
RVVGL	10610	88	5	543.362	1	16.17	15700000	542.354	1.1
LLTAY	10802	87	5	580.345	1	16.47	16100000	579.327	19.2
WNSL	23509	87	4	519.256	1	35.97	14200000	518.249	0.3
YSPM(+15.99)L	18578	87	5	626.28	1	28.38	601000000	625.278	-8.3
LFPK	14513	87	4	252.662	2	22.14	76600000	503.311	-0.8
RPPQPR	10943	87	6	375.722	2	16.68	33800000	749.43	-0.5
SVLSPK	8381	87	6	315.695	2	12.78	541000000	629.375	-0.4
SFLVPPK	21129	87	7	394.239	2	32.31	117000000	786.464	-1
NGTQKPL	6825	87	7	379.213	2	10.41	22500000	756.413	-2.1
KLLTQGY	6117	87	7	411.745	2	9.34	62000000	821.465	13.2
LPHNF	17810	87	5	314.166	2	27.2	32200000	626.318	-0.7
SFLVPPK	22137	87	7	394.239	2	33.86	117000000	786.464	-1.2
NEPWWPK	28039	87	7	478.735	2	42.92	55100000	955.455	0.4
VGFPK	13422	87	5	547.324	1	20.48	39700000	546.317	0.2
AALQTPK	8868	87	7	364.718	2	13.52	20400000	727.423	-1.6
VGFPK	13072	87	5	547.324	1	19.94	39700000	546.317	0.8
QFPFPPPR	30139	86	8	493.266	2	46.14	32100000	984.518	-0.1
FAGF	27029	86	4	441.212	1	41.37	447000000	440.206	-2
PFQPPR	12658	86	6	371.206	2	19.3	130000000	740.397	-0.4
LASPR	6061	86	5	543.325	1	9.25	15200000	542.318	-0.5
FKNQGY	9647	86	6	756.366	1	14.71	19100000	755.36	-1.6
FAVPF	35706	86	5	580.313	1	54.66	22100000	579.306	-0.2
SPHNW	9877	85	5	320.645	2	15.05	66400000	639.277	-1
WNNL	22683	85	4	546.267	1	34.7	222000000	545.26	0
TFAGF	25529	85	5	542.261	1	39.07	14000000	541.254	0.3
LRSL	10275	85	4	244.663	2	15.66	204000000	487.312	0.3
WNPDNPK	12143	85	7	435.709	2	18.51	75000000	869.403	0.3
LSLPK	14326	85	5	557.366	1	21.86	10100000	556.358	0.2
LPHNF	17474	85	5	314.166	2	26.69	32200000	626.318	-0.8
KDGLYSAY	9305	85	8	458.73	2	14.19	127000000	915.434	11.9
SFLVPPK	21801	85	7	394.239	2	33.34	117000000	786.464	-1.1
VLPPK	8248	85	5	277.189	2	12.57	156000000	552.364	0.1
SFLVPPK	22473	85	7	394.239	2	34.38	117000000	786.464	-1.4
QGTPLFPR	20786	85	8	458.255	2	31.78	87800000	914.497	-1
NEPWWPK	27705	84	7	478.735	2	42.41	55100000	955.455	0
SLLPK	13990	84	5	557.365	1	21.34	10100000	556.358	-0.8
LSSPY	15840	84	5	566.282	1	24.18	45500000	565.275	-0.7
SFLVPPK	21466	84	7	394.239	2	32.83	117000000	786.464	-0.3
HLLPK	7016	84	5	304.2	2	10.71	20000000	606.385	-1.2
FNLGK	13547	84	5	289.668	2	20.67	198000000	577.322	-1.1
AGLVQRPL	17668	84	8	427.266	2	26.98	10100000	852.518	-0.5
PPYPR	12413	84	5	315.174	2	18.93	16600000	628.333	-0.3
SFLVPPK	21465	84	7	394.239	2	32.83	117000000	786.464	-0.3
VLPPK	8601	84	5	277.189	2	13.11	156000000	552.364	-0.4
VFKNPNSF	17467	84	8	476.748	2	26.67	40700000	951.481	0.8
FFML	38129	83	4	557.276	1	58.38	15900000	556.272	-6.5
VTPTKPL	11489	83	7	378.236	2	17.51	119000000	754.459	-0.8
VTPTKPL	11186	83	7	755.465	1	17.05	10900000	754.459	-2
LQGAY	17806	83	5	551.283	1	27.2	73600000	550.275	1.1
LPHL	10358	83	4	479.298	1	15.79	1770000000	478.29	0.4
YLSL	20628	82	4	495.281	1	31.53	13600000	494.274	-0.2
VGGFPR	13421	82	6	316.679	2	20.47	43500000	631.344	-1
LTAW	25479	82	4	490.266	1	38.99	14500000	489.259	-0.3
LVPPK	8266	82	5	277.189	2	12.6	156000000	552.364	-0.5
AHFPL	21350	82	5	584.319	1	32.65	12500000	583.312	-0.3
LFPTPR	14958	82	6	365.716	2	22.83	72200000	729.417	-0.6
LLNTPR	9557	82	6	357.219	2	14.57	403000000	712.423	-0.5
VFKNPNAY	17438	82	8	476.748	2	26.63	40700000	951.481	0
LPLR	11055	82	4	249.674	2	16.85	10100000	497.333	0.9
KFPPVSF	12663	82	7	411.237	2	19.31	181000000	820.448	13.3
LRPL	16960	82	4	498.34	1	25.9	70100000	497.333	0.4
VLGF	25550	82	4	435.26	1	39.1	16600000	434.253	-0.5
LLHPL	20298	81	5	296.695	2	31.03	189000000	591.374	0.1
NHRSPNL	5697	81	7	419.219	2	8.7	12400000	836.425	-1.1
LSGHF	11288	81	5	280.645	2	17.21	35100000	559.275	-1.1
YLVNAY	13823	81	6	742.388	1	21.09	154000000	741.37	14.3
SPHNW	10210	81	5	320.646	2	15.56	66400000	639.277	0.1
M(+15.99)M(+15.99)YNPK	15190	81	6	408.182	2	23.18	10100000	814.335	16.5
PFRPEPPR	11748	81	8	332.518	3	17.91	11000000	994.535	-2.4
KLADR	6947	81	5	602.352	1	10.6	17300000	601.355	-16.6
KFPPVSF	12659	81	7	411.237	2	19.3	181000000	820.448	13.3
LRPL	16938	81	4	498.34	1	25.86	70100000	497.333	0.1
KFPPVAY	13337	81	7	411.236	2	20.35	181000000	820.448	12.4
VDKPW	19578	81	5	322.674	2	29.92	11500000	643.333	-0.4
RPPR	9414	80	4	263.166	2	14.35	10000000	524.318	-0.7
LKSL	9843	80	4	230.661	2	15	79200000	459.306	2.3
VGGFPR	13758	80	6	316.679	2	20.99	43500000	631.344	-0.6
TTVTR	14313	80	5	289.171	2	21.84	56300000	576.323	6.4
KNNPF	11178	80	5	619.319	1	17.04	691000000	618.313	-1.1
PPYPR	12077	80	5	315.174	2	18.41	16600000	628.333	-0.2
EGLRPPR	8608	80	7	275.496	3	13.12	46600000	823.466	-0.6
WNNL	22350	80	4	546.267	1	34.19	222000000	545.26	0.5
LFGPY	30529	80	5	596.308	1	46.74	21200000	595.301	0.8
LYGGF	27453	80	5	556.277	1	42.02	29500000	555.269	0.4
LAGF	22283	80	4	407.228	1	34.09	156000000	406.222	-1.3
SVFPK	12774	79	5	289.17	2	19.48	10400000	576.327	-1.3
KYPHEL	8592	79	6	393.711	2	13.1	22600000	785.407	-0.2
YLPHL	19448	79	5	321.684	2	29.72	14800000	641.354	-0.7
LNAVVLPR	23484	79	8	441.282	2	35.93	15700000	880.549	0.4
LVNSF	13736	79	5	579.325	1	20.95	22600000	578.306	19.7
KNFVPK	7098	79	6	366.724	2	10.83	35000000	731.433	-0.5
SVGPWWPK	22704	79	8	478.753	2	34.73	17500000	955.492	-0.3
LSSPY	16175	79	5	566.282	1	24.69	45500000	565.275	0.2
WNPNNPK	11112	79	7	435.217	2	16.94	59000000	868.419	-0.2
LLTW	27225	79	4	532.313	1	41.67	36100000	531.306	0.6
LFVPPK	17833	79	6	350.723	2	27.24	19700000	699.432	-0.5
PFHTK	13085	79	5	315.174	2	19.96	26500000	628.333	-0.6
FKPL	14851	79	4	252.662	2	22.66	76600000	503.311	-0.8
LRHNGL	5938	79	6	355.208	2	9.07	74600000	708.403	-1.3
FAAGQLPK	14495	79	8	416.24	2	22.12	23000000	830.465	-0.3
QGTPLFPR	21493	79	8	458.257	2	32.87	87800000	914.497	1.2
SVFPGY	28898	79	6	669.323	1	44.24	12400000	668.317	-1.8
HFAF	8364	78	4	521.249	1	12.75	79400000	520.243	-3.7
VSFPSPK	16384	78	7	381.213	2	25.02	11400000	760.412	-0.8
KFPPVAY	14009	78	7	411.237	2	21.37	181000000	820.448	12.7
SLAPR	7020	78	5	272.165	2	10.72	90600000	542.318	-3
LVNSF	6516	78	5	579.325	1	9.95	243000000	578.306	18.9
TTVTR	14192	78	5	289.171	2	21.65	56300000	576.323	6.8
KLGGLTAL	7545	78	8	386.75	2	11.51	23700000	771.485	-1.3
LPHL	10355	78	4	479.298	1	15.78	1770000000	478.29	0.4
LTLQPK	11682	77	6	350.223	2	17.81	26300000	698.433	-0.6
KNNPF	11869	77	5	619.32	1	18.09	691000000	618.313	0.5
FPRQPPR	10944	77	7	449.256	2	16.68	17700000	896.498	0
LYGAL	17373	77	5	536.308	1	26.53	18100000	535.301	0.3
VLGHL	10054	77	5	269.671	2	15.32	11000000	537.327	-1
GYDL	15778	77	4	467.214	1	24.08	17600000	466.206	0
KNNPF	11670	77	5	619.319	1	17.79	691000000	618.313	-0.7
WSLNL	31806	77	5	632.339	1	48.69	92700000	631.333	-1.3
QFQSNPK	6454	77	7	424.716	2	9.86	10900000	847.419	-2.3
HKDKNPF	7163	77	7	443.232	2	10.93	173000000	884.45	-0.5
LRHNGL	5937	77	6	355.208	2	9.06	74600000	708.403	-1.3
FARPL	14812	77	5	603.361	1	22.6	12200000	602.354	-0.5
PQGLYSAY	12035	77	8	449.725	2	18.35	181000000	897.423	13
YVLR	15047	77	4	275.671	2	22.96	13600000	549.327	-0.8
YSPEMK	16488	76	6	754.339	1	25.18	437000000	753.337	-6.4
LLSF	17961	76	4	479.286	1	27.44	14700000	478.279	-0.4
KFPPVAY	13001	76	7	411.237	2	19.83	181000000	820.448	12.6
FGGL	24188	76	4	393.213	1	37.01	562000000	392.206	-0.6
VLPPK	9016	76	5	277.189	2	13.75	156000000	552.364	-0.7
DYYNPK	15189	76	6	400.184	2	23.18	20300000	798.355	-1.5
FLVPPK	17499	76	6	350.723	2	26.73	19700000	699.432	-0.3
QAGALPK	7462	76	7	684.403	1	11.39	31000000	683.397	-0.6
RLPL	17288	76	4	498.34	1	26.4	70100000	497.333	1
FPPAGSR	11135	76	7	366.195	2	16.97	153000000	730.376	-0.8
LLKPPR	8718	76	6	362.247	2	13.29	25300000	722.48	-0.2
LGVHL	12613	76	5	269.671	2	19.23	10700000	537.327	-0.6
YLVNGSF	13279	75	7	400.208	2	20.26	10600000	798.391	13
WNPDNPK	11464	75	7	435.708	2	17.47	55800000	869.403	-0.9
NGGPNPPR	5706	75	8	404.707	2	8.71	13100000	807.399	-0.2
NPNNKPF	10656	75	7	415.711	2	16.24	250000000	829.408	-0.5
PGFQKGW	10128	75	7	410.209	2	15.44	11600000	818.408	-5
WSDW	33333	75	4	593.235	1	51.03	12400000	592.228	-0.9
TTVTR	14547	75	5	289.171	2	22.19	56300000	576.323	5.8
LLNSTPR	9194	75	7	400.734	2	14.02	31000000	799.455	-1.2
LGVHL	12971	75	5	269.671	2	19.78	10700000	537.327	-0.8
SFLVPPK	22820	75	7	394.239	2	34.91	117000000	786.464	-0.9
YHFR	16324	75	4	622.298	1	24.92	11400000	621.302	-18.3
LLNRTPSL	16911	75	8	457.277	2	25.82	27800000	912.539	0.2
FPRPQPR	10590	75	7	449.257	2	16.14	17700000	896.498	1.5
KVLGASF	6631	74	7	361.221	2	10.12	12400000	720.417	15.6
TFVPR	17037	74	5	310.182	2	26.01	14500000	618.349	0
FLPK	9154	74	4	252.663	2	13.95	11500000	503.311	-0.2
FALPR	14816	74	5	302.184	2	22.61	111000000	602.354	-0.6
WSLNL	31808	74	5	632.339	1	48.7	92700000	631.333	-1.3
LYPF	31818	74	4	539.287	1	48.71	11600000	538.279	0.3
LRSL	10481	74	4	488.319	1	15.98	91300000	487.312	0.4
WPDGLK	19893	74	6	358.192	2	30.41	13700000	714.37	-1
HGRPGAGL	6306	74	8	382.711	2	9.63	16400000	763.409	-1.6
EGVAKLPR	14310	74	8	290.512	3	21.83	23200000	868.513	0
TFVSPR	11743	74	6	353.697	2	17.9	51400000	705.381	-2.4
HQYPL	14388	73	5	657.335	1	21.95	40300000	656.328	-0.7
YLVNSF	13472	73	6	742.387	1	20.55	154000000	741.37	13.3
KFPPVAY	13674	73	7	411.237	2	20.86	181000000	820.448	13.3
GPFPPR	16815	73	6	335.687	2	25.68	13400000	669.36	-1.6
YLSPK	7795	73	5	304.176	2	11.9	10800000	606.338	-0.6
WSPQW	35936	73	5	703.319	1	55.01	22500000	702.313	-1.6
GPFPPR	16805	73	6	335.687	2	25.66	13400000	669.36	-1.6
NLASPR	6859	73	6	329.187	2	10.47	78100000	656.361	-1
KFPPVAY	14353	73	7	411.237	2	21.9	181000000	820.448	14
SVVLR	9793	72	5	573.372	1	14.93	141000000	572.365	-0.2
QFPFPPPR	30475	72	8	493.266	2	46.66	32100000	984.518	-0.1
GPFPPR	16338	72	6	335.687	2	24.94	13400000	669.36	-1.1
KNNPF	11213	72	5	310.163	2	17.09	2050000000	618.313	0
HLDW	16680	72	4	570.267	1	25.47	56700000	569.26	0.3
PFPGVHGK	16445	72	8	419.732	2	25.11	505000000	837.45	-0.9
FREL	16755	72	4	282.661	2	25.58	12000000	563.307	-0.2
SRNPLSY	11600	72	7	836.427	1	17.68	21200000	835.419	1.4
DFVPPK	17807	72	6	351.7	2	27.2	11800000	701.375	15.8
ALHPL	14287	71	5	275.671	2	21.8	10900000	549.327	0
HSPLPPR	6823	71	7	268.489	3	10.41	17400000	802.445	-1.3
PFHTK	12749	71	5	315.174	2	19.45	26500000	628.333	-0.5
TMLSAPR	8436	71	7	388.214	2	12.86	16100000	774.406	9.7
HLLPK	7982	71	5	304.2	2	12.18	52700000	606.385	-1.3
GLTPPPF	24702	71	7	728.396	1	37.8	21600000	727.39	-1.9
TQTKSGW	6751	71	7	807.398	1	10.3	33300000	806.392	-2.1
QLHVPR	13842	71	6	375.224	2	21.12	43400000	748.434	-1.1
QQPPR	19556	71	5	313.176	2	29.89	19800000	624.334	6.5
PFPRQPPR	11051	71	8	332.191	3	16.84	880000000	993.551	0
FFML	38474	71	4	557.276	1	58.92	15900000	556.272	-6.4
VDW	22489	71	3	419.192	1	34.4	11200000	418.185	-0.8
VPAR	9195	71	4	442.277	1	14.02	46000000	441.27	-0.4
PVFPPK	7773	71	6	342.705	2	11.86	258000000	683.401	-7
SGPPR	13827	70	5	257.145	2	21.09	12700000	512.271	7.9
SFLVPPK	22843	70	7	394.239	2	34.94	117000000	786.464	-1.2
LAPVNPGK	9290	70	8	398.24	2	14.16	13200000	794.465	-0.8
FPPFPPR	29166	70	7	429.237	2	44.65	25400000	856.46	-0.5
NGLYSSF	11458	69	7	394.19	2	17.46	55500000	786.355	14.2
FFPF	38812	69	4	557.276	1	59.44	15900000	556.269	-0.1
M(+15.99)NPPR	16704	69	5	315.657	2	25.5	382000000	629.295	7
GPVPR	7221	69	5	263.16	2	11.02	45100000	524.307	-1.9
KFPQAY	8259	69	6	377.206	2	12.59	250000000	752.386	14.7
VRPL	11646	69	4	484.325	1	17.75	12200000	483.317	1.9
LLNDPR	9352	69	6	364.208	2	14.26	17000000	726.402	-1
LLPR	8043	69	4	498.34	1	12.27	14600000	497.333	0.4
AFGNL	22359	69	5	521.273	1	34.2	37400000	520.264	1.5
LSW	26004	69	3	405.213	1	39.8	29400000	404.206	-1.2
WSSPW	36333	69	5	662.292	1	55.62	508000000	661.286	-1.5
HAFPL	21698	69	5	584.316	1	33.19	12500000	583.312	-5.5
HQYPL	14055	69	5	657.335	1	21.44	40300000	656.328	0
RATTSAPR	6074	68	8	430.241	2	9.27	12700000	858.467	-0.3
YAGAPF	25313	68	6	625.297	1	38.73	17300000	624.291	-1.7
FPQSF	10818	68	5	625.309	1	16.49	10700000	624.291	18
LPW	28143	68	3	415.233	1	43.08	10300000	414.227	-1.5
SLW	26338	68	3	405.213	1	40.31	29400000	404.206	-1.6
WSPW	36563	68	4	575.261	1	55.98	327000000	574.254	-1.2
LPHSNF	17411	68	6	357.682	2	26.59	236000000	713.35	-1
WNPDNPK	11806	68	7	435.709	2	18	55800000	869.403	0
SRNPLSY	11888	68	7	418.717	2	18.12	305000000	835.419	0
FLHPL	23232	68	5	313.686	2	35.54	106000000	625.359	-1.9
WDAW	30236	68	4	577.24	1	46.29	11800000	576.233	-0.9
KNNPF	11189	68	5	310.163	2	17.05	2050000000	618.313	-1.2
KLLTSF	8402	67	6	354.723	2	12.81	226000000	707.422	14.9
FPQAY	10471	67	5	625.309	1	15.96	10700000	624.291	18.1
QQPPR	20564	67	5	313.176	2	31.44	19800000	624.334	5.7
LLAHSF	6696	67	6	344.2	2	10.22	25500000	686.375	14.4
FSLVPPK	23180	67	7	394.239	2	35.46	117000000	786.464	-0.8
FPF	32510	67	3	410.207	1	49.77	1100000000	409.2	-1.5
FPVMSL	17875	67	6	347.189	2	27.3	46700000	692.357	10.4
DFF	35182	67	3	428.181	1	53.86	19800000	427.174	-0.8
LLQHL	11104	67	5	312.197	2	16.92	29600000	622.38	-0.9
GLF	24467	67	3	336.192	1	37.44	1180000000	335.185	-0.5
TPSGPK	7847	67	6	586.331	1	11.97	161000000	585.312	19.4
FPF	33518	67	3	410.207	1	51.31	1100000000	409.2	-1.3
LGVHL	12745	67	5	269.671	2	19.44	10700000	537.327	-0.5
FPF	33854	67	3	410.207	1	51.83	1100000000	409.2	-1.3
LPHL	9851	67	4	240.152	2	15.02	6000000000	478.29	-0.2
LPHSNF	17747	67	6	357.682	2	27.11	236000000	713.35	-0.8
FPF	34190	67	3	410.207	1	52.34	1100000000	409.2	-1.2
FPL	28668	67	3	376.223	1	43.89	23000000	375.216	-1.5
LGPW	31288	67	4	472.255	1	47.9	13700000	471.248	-0.4
FPL	26988	66	3	376.222	1	41.31	131000000	375.216	-1.8
FPF	34526	66	3	410.207	1	52.85	1100000000	409.2	-1.2
PLF	25266	66	3	376.223	1	38.66	28700000	375.216	-0.9
FPL	28332	66	3	376.223	1	43.37	23000000	375.216	-1.3
SRNPLSY	11556	66	7	418.717	2	17.61	305000000	835.419	0.8
YPF	25328	66	3	426.202	1	38.76	99000000	425.195	-0.8
QQPPR	20229	66	5	313.176	2	30.92	19800000	624.334	5.7
FPF	33182	66	3	410.207	1	50.8	1100000000	409.2	-1.2
FLL	32177	66	3	392.254	1	49.26	10600000	391.247	-1
FPF	32846	66	3	410.207	1	50.29	1100000000	409.2	-1.1
FPK	13156	66	3	391.234	1	20.07	21400000	390.227	0.1
WVAPL	31032	66	5	585.339	1	47.51	15800000	584.332	-0.9
PNNKPF	10311	66	6	358.69	2	15.71	97800000	715.365	0.6
NLF	24230	66	3	393.213	1	37.07	562000000	392.206	-1.7
FPL	29005	66	3	376.223	1	44.4	23000000	375.216	-1
VPF	20708	66	3	362.207	1	31.66	90900000	361.2	-1.2
DFF	35514	66	3	428.181	1	54.37	19800000	427.174	-1.2
FAAGQLPK	14142	66	8	416.24	2	21.58	23000000	830.465	0.2
LLF	29247	66	3	392.254	1	44.77	13200000	391.247	-0.7
PFPGVHGK	16109	66	8	419.732	2	24.59	505000000	837.45	-0.5
FSF	23790	66	3	400.187	1	36.4	12000000	399.179	0.2
FPL	27996	66	3	376.223	1	42.86	32900000	375.216	-1
FPK	13160	66	3	391.234	1	20.07	21400000	390.227	0.1
AYPF	26525	66	4	497.24	1	40.6	327000000	496.232	0.3
LPF	27660	66	3	376.223	1	42.34	32900000	375.216	-1.4
FPL	26652	66	3	376.223	1	40.79	131000000	375.216	-1.3
FPL	29018	66	3	376.223	1	44.42	23000000	375.216	-1
SWL	27369	66	3	405.213	1	41.89	212000000	404.206	-1.5
LPR	10976	66	3	385.256	1	16.73	19500000	384.248	-0.5
HVVGLF	24303	66	6	671.375	1	37.19	51700000	670.38	-18.1
KFPGFPK	13371	66	7	274.165	3	20.4	36700000	819.464	11.8
LLR	9688	66	3	401.287	1	14.77	10100000	400.28	-0.8
PNNKPF	10649	66	6	358.69	2	16.23	97800000	715.365	-0.5
FPL	29340	66	3	376.223	1	44.92	23000000	375.216	-1.1
FPF	34862	66	3	410.207	1	53.37	1100000000	409.2	-1.1
LLHSF	6202	66	5	308.681	2	9.47	15200000	615.338	16.2
FPL	26318	66	3	376.223	1	40.28	131000000	375.216	-1.1
LLNSF	9810	66	5	297.173	2	14.95	145000000	592.322	17.3
LPR	8000	65	3	385.255	1	12.2	16100000	384.248	-0.8
FPF	35201	65	3	410.207	1	53.89	1100000000	409.2	-1.3
YLVNAY	13799	65	6	371.698	2	21.05	1860000000	741.37	15.4
LQGFPM(+15.99)L	12813	65	7	411.217	2	19.54	31900000	820.415	4.7
FNL	25202	65	3	393.213	1	38.57	562000000	392.206	-1
YPL	19975	65	3	392.218	1	30.53	40900000	391.211	-0.2
PPK	8319	65	3	341.218	1	12.68	130000000	340.211	-0.3
WGNEAGF	26067	65	7	780.329	1	39.89	18400000	779.324	-2.8
LLW	31449	65	3	431.265	1	48.15	31500000	430.258	-1.7
LRSL	10633	65	4	244.663	2	16.21	204000000	487.312	-0.1
LGPW	31266	65	4	472.255	1	47.87	13700000	471.248	-1.2
NAVMVSF	8990	65	7	384.195	2	13.71	83500000	766.368	9.8
YPL	20309	65	3	392.217	1	31.05	40900000	391.211	-1.2
SLR	10305	65	3	375.235	1	15.71	45400000	374.228	0.2
SPK	8072	65	3	331.198	1	12.31	16600000	330.19	0.2
YLQGSF	23988	65	6	714.344	1	36.7	118000000	713.338	-1.8
LLNSF	9874	65	5	593.34	1	15.05	35000000	592.322	17.8
VATVLSPR	18108	65	8	421.758	2	27.66	16500000	841.502	-1
HVVGLGF	24358	65	7	728.397	1	37.27	21600000	727.402	-16.8
YHSVPK	7175	65	6	365.697	2	10.95	48700000	729.381	-1
LLAHSF	6694	65	6	344.2	2	10.22	25500000	686.375	14.4
LPW	28480	65	3	415.233	1	43.6	10300000	414.227	-1.7
SKRPTSL	5724	65	7	394.734	2	8.74	19200000	787.455	-1.4
QLHVPR	13507	65	6	375.224	2	20.61	43400000	748.434	-1.3
EC(+57.02)C(+57.02)AKPK	8586	65	7	446.705	2	13.08	19800000	891.394	0.9
FGL	24803	65	3	336.192	1	37.95	1180000000	335.185	-0.9
LPF	24916	65	3	376.223	1	38.12	28700000	375.216	-1
LLQGY	9521	65	5	593.34	1	14.52	35000000	592.322	18.2
SLR	10453	65	3	375.235	1	15.93	45400000	374.228	-0.2
SFEVW	35708	65	5	667.308	1	54.66	27100000	666.301	-1.1
HPDPLW	13493	65	6	764.369	1	20.58	13300000	763.365	-5.4
VPF	20475	65	3	362.207	1	31.3	90900000	361.2	-1.5
LPHL	10187	65	4	240.153	2	15.53	6000000000	478.29	0.8
HGRPGTQL	6614	65	8	433.235	2	10.09	39100000	864.457	-1.4
GPARPGFPL	24769	65	9	456.259	2	37.9	30500000	910.502	0.2
FPL	26323	65	3	376.223	1	40.29	131000000	375.216	-1.1
VLQRNF	13887	65	6	388.724	2	21.18	24800000	775.434	0
APW	20048	64	3	373.187	1	30.64	39400000	372.18	-0.4
NAVMVSF	8658	64	7	384.195	2	13.2	90900000	766.368	8.9
FKNQGY	9625	64	6	378.687	2	14.67	164000000	755.36	-1.1
YPF	25666	64	3	426.202	1	39.28	99000000	425.195	-0.6
FMVAY	16765	64	5	630.307	1	25.6	18800000	629.288	17.3
DQLLQTPK	7742	64	8	471.76	2	11.81	18600000	941.518	-14.4
SVFPSPK	16035	64	7	381.213	2	24.48	11400000	760.412	-1.2
FPL	27324	64	3	376.222	1	41.82	32900000	375.216	-1.7
SWL	27361	64	3	405.213	1	41.88	212000000	404.206	-1.2
YLVNSF	13446	64	6	371.697	2	20.51	1860000000	741.37	14.5
VPF	21044	64	3	362.207	1	32.18	90900000	361.2	-1.9
PLF	25620	64	3	376.223	1	39.2	28700000	375.216	-0.6
FGL	27180	64	3	336.191	1	41.6	13200000	335.185	-1.7
LRPPML	25268	64	6	363.718	2	38.67	154000000	725.426	-5.7
SDVNPR	11679	64	6	344.176	2	17.8	24500000	686.335	5.1
WPF	36418	64	3	449.218	1	55.76	14100000	448.211	-0.2
FVEHAVK	9815	64	7	415.231	2	14.96	16700000	828.449	-1.6
PPK	8267	64	3	341.218	1	12.6	130000000	340.211	0.2
RDGLYSAY	9768	64	8	472.733	2	14.89	137000000	943.44	11.9
VPLR	8047	64	4	484.324	1	12.27	30300000	483.317	0.4
VPRL	8386	64	4	242.666	2	12.78	28000000	483.317	0.8
KTNDHGK	7479	64	7	400.206	2	11.41	11000000	798.398	-0.5
KPMLPK	9211	64	6	357.22	2	14.04	403000000	712.431	-7
TGSVLPR	12901	64	7	365.216	2	19.68	34700000	728.418	0.3
KFPPVSF	14705	64	7	411.237	2	22.44	181000000	820.448	12.8
HVVF	9708	64	4	501.279	1	14.8	97400000	500.275	-4.9
LLPHL	20658	64	5	296.694	2	31.58	189000000	591.374	-1
LLR	10043	64	3	401.287	1	15.31	27400000	400.28	-0.6
VPW	25270	64	3	401.218	1	38.67	73900000	400.211	-1.3
APF	16028	63	3	334.176	1	24.47	48600000	333.169	-1.2
YPL	20647	63	3	392.218	1	31.57	40900000	391.211	-1
PPK	8698	63	3	341.219	1	13.26	130000000	340.211	1.3
KNNPF	11860	63	5	310.163	2	18.08	2050000000	618.313	0
KNNPF	11510	63	5	310.163	2	17.54	2050000000	618.313	-0.1
LLGSF	9436	63	5	268.663	2	14.39	31600000	535.301	19.9
TGALVPR	13080	63	7	357.219	2	19.95	15600000	712.423	0.1
SFF	29079	63	3	400.186	1	44.52	11600000	399.179	-0.9
LAHL	8603	63	4	227.145	2	13.11	15600000	452.275	0.1
LLPHL	20595	63	5	296.694	2	31.48	189000000	591.374	-0.4
KGGGLYSSF	8297	63	9	458.238	2	12.65	33500000	914.45	12.5
VPW	25603	63	3	401.218	1	39.18	73900000	400.211	-0.8
LRHNGL	5961	63	6	237.141	3	9.1	10700000	708.403	-0.8
LPY	16511	63	3	392.218	1	25.21	11000000	391.211	-0.8
HPKGY	6520	63	5	601.307	1	9.96	24600000	600.302	-4.6
NPF	16130	63	3	377.182	1	24.62	196000000	376.175	-0.4
LPR	8476	62	3	385.256	1	12.92	19700000	384.248	-0.5
PPK	8667	62	3	341.218	1	13.21	130000000	340.211	-1
TAAQGGK	7925	62	7	316.674	2	12.09	19500000	631.329	6.1
LGW	24622	62	3	375.202	1	37.67	49200000	374.195	-2.2
KNNPF	11863	62	5	310.163	2	18.08	2050000000	618.313	0
PLR	8416	62	3	385.255	1	12.83	19700000	384.248	-0.8
SPF	15711	62	3	350.171	1	23.98	24500000	349.164	-0.2
M(+15.99)GPPR	10884	62	5	573.278	1	16.59	15900000	572.274	-5.4
QPY	10135	62	3	407.193	1	15.45	10900000	406.185	0.2
FRGPSL	13257	62	6	338.692	2	20.22	10500000	675.37	-0.9
FGL	25812	62	3	336.192	1	39.5	13200000	335.185	-0.9
GLGF	24530	62	4	393.213	1	37.54	562000000	392.206	-1.1
RDGLYSSF	9831	62	8	315.491	3	14.99	29900000	943.44	10.6
KFGPFPK	13444	62	7	274.165	3	20.51	36700000	819.464	11.9
KYGAGNSGPL	12497	62	10	482.249	2	19.06	84600000	962.482	1.2
APF	16034	62	3	334.176	1	24.47	48600000	333.169	-1.2
TGVFHY	17793	62	6	362.176	2	27.18	93200000	722.339	-0.6
HLTPPTR	13022	62	7	274.494	3	19.86	20200000	820.456	4.8
PPK	8541	62	3	341.218	1	13.02	130000000	340.211	0
FPAGSPR	11471	62	7	366.195	2	17.48	153000000	730.376	-1.6
TGALVPR	13094	62	7	357.219	2	19.97	15600000	712.423	-0.1
PFPPQPR	15773	62	7	419.732	2	24.08	505000000	837.45	0.5
STKNNAF	11513	62	7	391.19	2	17.55	45900000	780.377	-15.2
LGW	26519	61	3	375.202	1	40.59	24800000	374.195	-2.9
LSPHL	17558	61	5	283.668	2	26.82	47600000	565.322	-1.3
FPAGSPR	10461	61	7	366.195	2	15.95	153000000	730.376	0
HGGFPPEPR	11930	61	9	331.831	3	18.19	15200000	992.483	-11.9
M(+15.99)PK	14586	61	3	391.197	1	22.25	85700000	390.194	-9.7
VLGDVPPK	8356	61	8	275.496	3	12.73	46600000	823.48	-17.7
LKTNDHGK	7437	61	8	456.749	2	11.35	10400000	911.482	0.2
AGAGALPK	7430	61	8	342.705	2	11.34	258000000	683.397	-0.4
PVAHPY	7986	61	6	342.179	2	12.18	111000000	682.344	-1.4
FTGEW	30523	61	5	639.276	1	46.73	23400000	638.27	-1.5
VPR	6934	61	3	371.24	1	10.59	11800000	370.233	-1.1
KYPHEL	8242	61	6	393.712	2	12.56	22600000	785.407	2.5
WVHEL	20337	61	5	342.179	2	31.09	53100000	682.344	-0.8
PHTLPTR	12691	61	7	274.494	3	19.36	20200000	820.456	4.8
PLFPPR	25605	61	6	363.718	2	39.18	154000000	725.422	-0.8
VSVPK	8418	61	5	265.17	2	12.83	143000000	528.327	-5.1
GPK	9068	61	3	301.187	1	13.82	13700000	300.18	-0.9
TGALVPR	13141	61	7	357.219	2	20.04	15600000	712.423	-0.6
HVVF	10063	61	4	501.28	1	15.34	97400000	500.275	-3.7
LRPPPF	24257	60	6	363.718	2	37.12	154000000	725.422	-0.8
NSAGDL	36637	60	6	576.264	1	56.09	20200000	575.255	2.7
HFAF	8008	60	4	521.249	1	12.22	79400000	520.243	-4.2
LQGFSNK	12123	60	7	397.214	2	18.48	19400000	792.413	-0.2
VPR	9235	60	3	371.24	1	14.08	13500000	370.233	-0.9
THSNPPR	6051	60	7	404.706	2	9.24	13100000	807.399	-1.9
LPHSNF	17078	60	6	357.682	2	26.08	236000000	713.35	-0.6
PFY	21003	60	3	426.202	1	32.12	48700000	425.195	-0.2
TPW	8111	60	3	403.196	1	12.37	75100000	402.19	-3
PPR	15082	60	3	369.224	1	23.02	66500000	368.217	-1
SVVLR	9813	60	5	287.189	2	14.96	28100000	572.365	-1
RSNPL	7858	60	5	293.669	2	11.99	261000000	585.323	-0.7
LW	21401	60	2	318.181	1	32.73	251000000	317.174	-0.9
GVPY	15693	60	4	435.224	1	23.95	1360000000	434.216	-0.2
HPTL	10803	60	4	467.261	1	16.47	12100000	466.254	-0.7
SYQNPF	11630	60	6	378.177	2	17.73	12700000	754.329	14.8
KFGPFPK	13360	60	7	274.165	3	20.38	36700000	819.464	11.8
WPW	34889	60	3	488.23	1	53.41	22000000	487.222	0.9
QFPFPPPR	29804	60	8	493.266	2	45.63	32100000	984.518	-0.3
PPR	15752	60	3	369.224	1	24.04	66500000	368.217	-1.3
LPF	28098	59	3	376.223	1	43.01	23000000	375.216	-1
LFPK	14178	59	4	252.663	2	21.63	76600000	503.311	0.1
KFPGFPK	13095	59	7	274.165	3	19.97	36700000	819.464	12.4
HLQPW	18254	59	5	680.35	1	27.89	10900000	679.344	-1.5
LVNHLPK	9146	59	7	410.755	2	13.94	16000000	819.497	-0.7
KNNPHF	7411	59	6	378.693	2	11.31	23600000	755.371	-0.2
RDGLYSSF	10104	59	8	472.733	2	15.4	137000000	943.44	13.1
VPR	9213	59	3	371.24	1	14.05	13500000	370.233	-1.1
VFMSLPR	19808	59	7	425.234	2	30.28	17400000	848.458	-5.8
PPR	15156	59	3	369.224	1	23.13	66500000	368.217	-0.8
TGC(+57.02)PPR	6828	59	6	344.167	2	10.42	83600000	686.317	4.9
VGAMAW	33731	59	6	634.298	1	51.64	19400000	633.294	-5.6
KHNQGLK	8230	59	7	412.74	2	12.54	110000000	823.466	-1.7
VLSFPPK	23527	59	7	394.239	2	36	117000000	786.464	-1.4
PPR	16091	59	3	369.224	1	24.56	66500000	368.217	-0.7
TATATL	7989	59	6	289.158	2	12.19	14300000	576.312	-18
SYPSPGF	16261	59	7	754.339	1	24.82	437000000	753.333	-1.6
HQYPL	14387	59	5	329.171	2	21.95	53600000	656.328	-0.3
ANAPPR	18489	59	6	313.176	2	28.25	15200000	624.334	5.8
TTGPKLPR	14160	59	8	290.511	3	21.6	23200000	868.513	-1
FPY	23019	59	3	426.202	1	35.22	48700000	425.195	-0.7
TNAPPLR	9051	59	7	384.721	2	13.8	48600000	767.429	-0.9
EMNPR	10989	59	5	323.654	2	16.75	77000000	645.29	5.4
LL	12701	59	2	245.186	1	19.37	13000000	244.179	-0.3
RTVTW	6852	58	5	331.684	2	10.46	13200000	661.355	-0.9
RGW	23871	58	3	418.221	1	36.52	17700000	417.212	2
GYAF	16068	58	4	457.206	1	24.53	52700000	456.201	-5.4
WSPQW	35582	58	5	703.318	1	54.47	22500000	702.313	-2.3
SFPVF	30873	58	5	596.308	1	47.27	21200000	595.301	-0.4
FGVL	29448	58	4	435.26	1	45.08	52200000	434.253	-0.3
LL	13269	58	2	245.186	1	20.24	127000000	244.179	0.1
SYPSPGF	16155	58	7	754.339	1	24.66	437000000	753.333	-1.6
GPFPPR	16467	58	6	335.687	2	25.14	13400000	669.36	-1.2
KNNPF	11821	58	5	310.163	2	18.02	2050000000	618.313	-0.3
MASSPW	33355	58	6	678.287	1	51.06	10100000	677.284	-6.4
SFPAY	24301	58	5	584.271	1	37.18	10100000	583.264	-0.6
KNNNPF	12396	58	6	367.185	2	18.9	31100000	732.356	-0.7
LYPF	32158	58	4	539.286	1	49.23	11600000	538.279	-0.1
DSGTPPK	19157	57	7	351.175	2	29.27	19400000	700.339	-4.8
LPNHL	9464	57	5	297.174	2	14.43	145000000	592.333	-0.4
AKLW	30770	57	4	517.313	1	47.11	11000000	516.306	0.2
TAKPGTHPR	5266	57	9	482.77	2	8.03	10900000	963.525	-0.4
TPW	7764	57	3	403.197	1	11.85	75100000	402.19	-0.6
KNSGDPR	10896	57	7	387.199	2	16.61	10500000	772.383	1.9
FGAF	26680	57	4	441.213	1	40.83	447000000	440.206	-1
PPF	17194	57	3	360.192	1	26.26	15200000	359.185	-0.5
RDGLYSSF	9415	57	8	472.733	2	14.35	33800000	943.44	11.9
FPQSF	10733	57	5	313.158	2	16.36	149000000	624.291	17.4
MFVSF	17054	57	5	315.657	2	26.04	382000000	629.288	18.1
FPVSML	18550	57	6	347.189	2	28.34	46700000	692.357	10.4
LW	23086	56	2	318.181	1	35.32	28300000	317.174	-0.7
AC(+57.02)PGPK	8058	56	6	315.156	2	12.29	28600000	628.3	-6.1
LGGF	25255	56	4	393.213	1	38.65	562000000	392.206	-1.5
WSSPW	36341	56	5	331.65	2	55.63	15000000	661.286	-1
LPF	25613	56	3	376.223	1	39.19	28700000	375.216	-0.6
TQSEPR	13152	56	6	359.173	2	20.06	13500000	716.345	-19.5
RYPNDSF	6071	56	7	449.712	2	9.27	112000000	897.398	12.2
QLHVPR	13163	56	6	375.224	2	20.08	43400000	748.434	-0.1
NSPHL	7075	56	5	284.147	2	10.8	19100000	566.281	-1.3
LL	12636	56	2	245.186	1	19.27	13000000	244.179	-0.1
TAGHVPR	6748	56	7	369.2	2	10.3	26100000	736.398	-15.9
AVMVSF	8172	56	6	327.174	2	12.46	452000000	652.325	10.9
LW	21056	56	2	318.181	1	32.2	251000000	317.174	-1.8
LL	14927	56	2	245.186	1	22.78	71000000	244.179	-1.1
LRQNL	9155	56	5	322.198	2	13.96	26700000	642.381	-1
SMVVAY	7365	56	6	335.171	2	11.24	12400000	668.32	10.6
LGGASPR	6884	56	7	657.367	1	10.51	13900000	656.361	-1.7
LF	18759	56	2	279.169	1	28.66	486000000	278.163	-3.9
NSLSF	7103	56	5	284.148	2	10.84	19100000	566.27	18.7
MFVSF	17097	56	5	630.306	1	26.11	18800000	629.288	16.8
SLAQPF	11487	56	6	331.685	2	17.5	16500000	661.343	16.6
AFVSF	11720	56	5	285.655	2	17.87	21900000	569.285	19
MNGFSNK	12231	56	7	399.177	2	18.65	16400000	796.354	-18.3
VSGLPK	7915	55	6	300.689	2	12.07	14200000	599.364	-1.1
QGLVSTSK	6600	55	8	410.232	2	10.08	21100000	818.45	-0.3
NDDLPK	18816	55	6	351.175	2	28.75	19400000	700.339	-3.9
FPHL	14536	55	4	257.144	2	22.18	12700000	512.275	-0.6
DGLHPSY	14283	55	7	394.682	2	21.79	27200000	787.35	-0.5
FW	26642	55	2	352.165	1	40.78	12200000	351.158	-1.5
LL	13239	55	2	245.186	1	20.19	127000000	244.179	0.3
FL	20225	55	2	279.169	1	30.92	1570000000	278.163	-3.6
LPHL	9673	55	4	479.298	1	14.75	1770000000	478.29	0.7
ALLPHL	23060	55	6	332.213	2	35.28	71600000	662.412	-1
YSFSSW	16178	55	6	388.665	2	24.7	47200000	775.318	-3.6
FASML	21864	55	5	568.276	1	33.44	10500000	567.273	-6.5
HANPF	11576	55	5	293.137	2	17.64	40100000	584.271	-19.9
WTGGY	18632	55	5	583.251	1	28.47	19000000	582.244	-0.2
YHFGSL	17775	55	6	723.346	1	27.15	20800000	722.339	0.5
PLPFPR	23286	55	6	363.718	2	35.63	154000000	725.422	-2.5
VRMQGPDR	7146	55	8	320.167	3	10.91	13700000	957.481	-2.1
TPPVR	7080	55	5	285.174	2	10.81	21500000	568.333	-1
LLLSF	18969	55	5	296.694	2	28.99	41200000	591.363	18.6
SPPY	14423	55	4	463.216	1	22.01	13300000	462.211	-6.6
VARPL	9170	54	5	555.364	1	13.98	47300000	554.354	4.4
LL	15272	54	2	245.186	1	23.31	71000000	244.179	-0.1
PYVPGGMF	20079	54	8	867.424	1	30.69	12200000	866.4	19.4
SGNVEPR	7841	54	7	379.686	2	11.96	49500000	757.372	-18.4
FL	16583	54	2	279.169	1	25.32	160000000	278.163	-3.6
VW	16880	54	2	304.166	1	25.77	10900000	303.158	-0.3
VF	13229	54	2	265.155	1	20.18	108000000	264.147	0
FF	23744	54	2	313.154	1	36.33	50700000	312.147	-1.4
KLATLNL	7617	54	7	386.75	2	11.62	23700000	771.485	-0.6
GC(+57.02)HPR	18688	54	5	313.644	2	28.55	11800000	625.275	-1.7
LW	23418	54	2	318.181	1	35.83	28300000	317.174	-1.1
KFTSLPK	9206	54	7	274.174	3	14.04	14900000	819.485	18.7
VF	13278	54	2	265.155	1	20.25	108000000	264.147	-0.3
FPSGSF	11575	54	6	641.302	1	17.64	35600000	640.286	13.7
EGM(+15.99)R	7838	54	4	254.615	2	11.96	69100000	507.211	8.3
KFPQSF	8614	54	6	377.206	2	13.13	250000000	752.386	14.8
TTGPKLPR	14509	54	8	290.512	3	22.14	23200000	868.513	-0.3
M(+15.99)THPK	8094	54	5	315.155	2	12.34	28600000	628.3	-6.7
YL	11290	54	2	295.165	1	17.21	18900000	294.158	-1
PPR	15416	54	3	369.224	1	23.53	66500000	368.217	-0.3
TSGAGPR	10982	54	7	323.171	2	16.74	11800000	644.324	5.8
FL	16474	54	2	279.17	1	25.15	160000000	278.163	-2.5
HANPF	11220	54	5	293.137	2	17.1	40100000	584.271	-19.7
YL	11309	54	2	295.165	1	17.24	18900000	294.158	-0.3
FL	19880	54	2	279.169	1	30.39	1570000000	278.163	-3.9
GEPF	15804	53	4	449.202	1	24.12	19100000	448.196	-1.3
HPLLF	23933	53	5	313.686	2	36.62	18700000	625.359	-1.2
HGLHPL	9683	53	6	337.192	2	14.76	18800000	672.371	-0.5
EFVSF	13351	53	5	314.649	2	20.36	13500000	627.29	-11.5
LF	21245	53	2	279.17	1	32.49	90800000	278.163	-1.6
LGGF	24866	53	4	393.213	1	38.05	562000000	392.206	-1
FGAVHL	14786	53	6	322.182	2	22.56	16200000	642.349	-0.7
LLPHL	19308	53	5	296.694	2	29.5	41200000	591.374	-1.1
KFVANSR	12781	53	7	411.236	2	19.49	181000000	820.456	2.7
PGFVSF	8509	53	6	327.174	2	12.97	452000000	652.322	17.5
LRPPML	24593	53	6	363.718	2	37.63	154000000	725.426	-4.9
LW	22490	53	2	318.181	1	34.4	98800000	317.174	-0.8
LW	24289	53	2	318.181	1	37.16	16700000	317.174	-0.5
FDC(+57.02)YC(+57.02)PK	18958	53	7	495.197	2	28.97	16800000	988.378	0.3
FNSKGNY	6768	53	7	415.194	2	10.33	23400000	828.377	-3.7
KLAW	10468	53	4	517.314	1	15.95	25200000	516.306	0.9
FL	20570	53	2	279.169	1	31.44	1570000000	278.163	-4.2
YL	13550	52	2	295.165	1	20.67	194000000	294.158	-1.4
KNKGGPF	7903	52	7	374.211	2	12.06	17700000	746.408	-0.6
EGAKAHPK	5850	52	8	419.238	2	8.93	11600000	836.45	11.9
VW	16797	52	2	304.165	1	25.65	10900000	303.158	-1.1
WL	22481	52	2	318.181	1	34.39	98800000	317.174	-0.8
SVGNPC(+57.02)PK	11641	52	8	429.708	2	17.74	14800000	857.407	-6.4
TPYSR	7331	52	5	312.161	2	11.19	16100000	622.307	-1.1
EGM(+15.99)R	7765	52	4	254.615	2	11.85	69100000	507.211	7.2
SFPAY	23969	52	5	584.271	1	36.67	10100000	583.264	0.1
RPSTY	6695	52	5	312.16	2	10.22	66000000	622.307	-2.4
LF	18512	52	2	279.171	1	28.28	486000000	278.163	3.9
KYEGNPGW	18734	52	8	475.722	2	28.63	15700000	949.429	0.5
YL	13215	52	2	295.165	1	20.16	194000000	294.158	-0.3
NSGFL	17737	52	5	537.267	1	27.09	158000000	536.26	0.3
NSGFL	18083	51	5	537.267	1	27.62	158000000	536.26	-0.1
VPGGTSQPPR	12113	51	10	332.519	3	18.47	11000000	994.52	14
LW	24636	51	2	318.181	1	37.7	16700000	317.174	-1.1
RLPPPF	23924	51	6	363.718	2	36.61	154000000	725.422	-1
PF	34067	51	2	263.139	1	52.15	25200000	262.132	-0.6
WW	31641	51	2	391.176	1	48.44	14400000	390.169	-1.9
PF	26238	51	2	263.139	1	40.16	31600000	262.132	-1.4
AFGNL	22015	51	5	521.271	1	33.67	37400000	520.264	-0.7
PTAALK	7860	51	6	600.371	1	11.99	17600000	599.364	-0.6
KNDKHPF	6974	51	7	295.824	3	10.65	316000000	884.45	-0.9
KHDNKPF	7310	51	7	295.824	3	11.16	316000000	884.45	-0.8
MVVSF	6453	50	5	291.655	2	9.86	1850000000	581.288	12
QVLHF	14451	50	5	322.182	2	22.05	16200000	642.349	-0.1
PF	33397	50	2	263.139	1	51.13	25200000	262.132	-0.5
HLQPW	17902	50	5	680.35	1	27.35	10900000	679.344	-2.4
WW	31666	50	2	391.176	1	48.48	14400000	390.169	-1.9
TGRTPY	7357	50	6	347.679	2	11.23	62500000	693.345	-0.9
TTGPKLPR	14507	50	8	290.512	3	22.13	23200000	868.513	-0.3
GLPHL	11326	50	5	268.663	2	17.26	24500000	535.312	-0.5
LGAGYSF	24323	50	7	714.345	1	37.22	118000000	713.338	-0.6
NPLGR	6983	50	5	556.32	1	10.66	32900000	555.313	0.1
HPLL	10019	50	4	479.298	1	15.27	1770000000	478.29	0.4
