# Supplementary material for: Isolation and identification of an α-glucosidase inhibitory peptide from extruded soybean protein and its hypoglycemic activity in T2DM mice
Source: Royal Society of Chemistry journal article supplement (doi:10.1039/d3fo00580a), 2023-01-01
Supplement: d3fo00580a3.xlsx [file d3fo00580a3.xlsx]

## Sheet: Raw data
Figure 1B
Time (days)	Body weight (g)
	NC		DM		PC		SPro		ESPro1		ESPro2		ESPro3
	Mean	SD	Mean	SD	Mean	SD	Mean	SD	Mean	SD	Mean	SD	Mean	SD
0	24.4	1.29743	22.1	0.326599	22.8833	1.98277	22.275	1.39172	23.1	0.571548	22.6	0.374166	22.6667	1.89795
7	25.02	1.03034	21.6667	0.736357	22.925	1.07092	23.0333	0.684755	24.075	1.00343	23.2	0.424264	23.6333	0.188562
14	25.34	0.863944	22.04	0.733757	23.4333	0.784573	23.7	0.535413	24.7833	0.978803	24.02	0.844748	24.025	0.438035
21	25.4571	0.734569	22.4	0.964045	24.6667	0.249444	23.9	0.163299	25.0429	0.920958	24.35	0.634429	24.5857	0.313636
28	25.7375	0.910958	22.725	0.882235	25.125	0.61796	24.5667	0.385861	25.8333	0.20548	24.6333	0.377124	24.775	0.129904
Figure 2A				Figure 2B
Extrusion temperature (℃)	α-Glucosidase inhibition rate (%)			Screw speed (r/min)	α-Glucosidase inhibition rate (%)
	Mean	SD			Mean	SD
0	39.7693	0.114165		0	39.7693	0.114165
140	51.3913	0.749521		24	55.7707	2.79277
150	41.6623	0.415073		27	43.9974	2.25094
160	61.7824	1.52414		30	61.7824	1.52414
170	39.6079	0.604316		34	57.14	1.37405
180	42.6017	1.94965		37	42.6455	1.09196
190	51.5662	1.14391		41	43.9506	1.8547
Figure 2C				Figure 2D
SPro digestive product molecular weight (kDa)	α-Glucosidase inhibition rate (%)			ESPro digestive product molecular weight (kDa)	α-Glucosidase inhibition rate (%)
	Mean	SD			Mean	SD
<1	42.0542	1.70623		<1	42.5062	2.7082
1-5	40.2534	1.62745		1-5	35.7864	0.707792
5-10	37.8993	0.257441		5-10	26.1001	4.55528
>10	5.3678	0.2334		>10	7.42578	0.3789
Figure 2E				Figure 2F
SPro purified fractions	α-Glucosidase inhibition rate (%)			ESPro purified fractions	α-Glucosidase inhibition rate (%)
	Mean	SD			Mean	SD
F1	0	0		F1	0	0
F2	0	0		F2	0.44084	0.235888
F3	23.9881	2.59861		F3	62.023	0.153773
F4	7.9581	1.21298		F4	11.5768	0.741951
F5	13.6575	1.90981		F5	0	0
Figure 3A
Time (days)	Fasting blood glucose (mmol/L)
	NC		DM		PC		SPro		ESPro1		ESPro2		ESPro3
	Mean	SD	Mean	SD	Mean	SD	Mean	SD	Mean	SD	Mean	SD	Mean	SD
0	5.05	0.26	15.2	3.19061	14.2	4.22	13.78	2.39	14.3	1.12	13.9	1.13	14.48	2.95
7	4.8	0.57	19.475	2.45815	14.38	3.23	15.75	0.81	15.73	2.67	15.65	2.71	16.18	3.28
14	4.88	0.69	19.375	1.32508	14.28	2.53	16.33	3.08	15.43	1.69	15.9	2.15	16.48	1.04
21	4.5	0.52	18.775	1.02103	13.6	2.24	16.35	1.63	14.83	0.68	15.73	0.46	16.53	0.45
28	4.25	0.59	16.325	1.96363	11.83	0.57	14.73	1.87	12.68	1.58	14.5	1.1	14.43	1.56
Figure 3B
Fasting insulin (pg/mL)
NC		DM		PC		SPro		ESPro1		ESPro2		ESPro3
Mean	SD	Mean	SD	Mean	SD	Mean	SD	Mean	SD	Mean	SD	Mean	SD
325.874	33.896	627.037	135.304	460.928	9.251	513.599	111.009	444.721	74.6982	326.772	125.419	494.113	43.8026
Figure 3C
Time (min)	Fasting blood glucose (mmol/L)
	NC		DM		PC		SPro		ESPro1		ESPro2		ESPro3
	Mean	SD	Mean	SD	Mean	SD	Mean	SD	Mean	SD	Mean	SD	Mean	SD
0	5.4	0.953939	17.1667	1.20554	11.7	2.78388	14.4667	1.35031	12.5667	1.76163	14.5333	0.64291	14.8667	0.80829
30	8.66667	1.07858	24.0667	1.56312	16.1667	1.59478	17.6333	1.10604	17.5	1.11355	19.5667	0.46188	20.9667	0.70946
60	7.96667	2.05994	21.9667	1.74738	16.2	0.87178	17.9667	0.64291	17.6333	2.47049	18.6667	1.62583	20.1667	1.12398
90	6.66667	1.23423	20	1	15.7667	0.585947	18.2667	2.0502	17.1667	1.09697	17.8667	1.58219	18.7667	0.64291
120	6.5	1.94679	19.4333	1.33167	14.5667	1.22202	17.4333	2.40901	16.7333	1.36504	17.4333	0.70946	17.9	1.60935
Figure 3D
Area under the curve
NC		DM		PC		SPro		ESPro1		ESPro2		ESPro3
Mean	SD	Mean	SD	Mean	SD	Mean	SD	Mean	SD	Mean	SD	Mean	SD
14.625	0.835165	42.1667	1.8509	30.6333	0.89803	34.9083	1.63866	33.475	1.90739	36.0417	0.677465	38.1417	1.61716
Figure 4A
Total cholesterol (mmol/L)
NC		DM		PC		SPro		ESPro1		ESPro2		ESPro3
Mean	SD	Mean	SD	Mean	SD	Mean	SD	Mean	SD	Mean	SD	Mean	SD
2.34667	0.198578	4.76333	1.28555	3.73667	0.518588	5.61	0.880511	4.46	0.829397	6.06	1.03204	6.57333	0.44658
Figure 4B
Total triglycerides (mmol/L)
NC		DM		PC		SPro		ESPro1		ESPro2		ESPro3
Mean	SD	Mean	SD	Mean	SD	Mean	SD	Mean	SD	Mean	SD	Mean	SD
0.736667	0.0450925	1.07333	0.142244	0.916667	0.0208167	1.02667	0.200083	1.03667	0.225906	0.9	0.14	1.02	0.03
Figure 4C
High-density lipoprotein (mmol/L)
NC		DM		PC		SPro		ESPro1		ESPro2		ESPro3
Mean	SD	Mean	SD	Mean	SD	Mean	SD	Mean	SD	Mean	SD	Mean	SD
2.58667	0.542617	1.26333	0.802515	2.30333	0.326241	2.39333	0.273008	2.54333	0.136504	2.08333	0.251661	2.32667	0.310215
Figure 4D
Low-density lipoprotein (mmol/L)
NC		DM		PC		SPro		ESPro1		ESPro2		ESPro3
Mean	SD	Mean	SD	Mean	SD	Mean	SD	Mean	SD	Mean	SD	Mean	SD
0.126667	0.0057735	0.606667	0.070946	0.356667	0.0650641	0.413333	0.219621	0.206667	0.0208167	0.76	0.185203	0.656667	0.0802081
Figure 5A
SOD (U/mg protein)
NC		DM		PC		SPro		ESPro1		ESPro2		ESPro3
Mean	SD	Mean	SD	Mean	SD	Mean	SD	Mean	SD	Mean	SD	Mean	SD
335.846	8.60272	186.956	36.031	290.348	44.8704	264.812	67.3058	289.245	39.7928	240.021	41.4339	267.557	43.218
Figure 5B
GSH-Px (U/mg protein)
NC		DM		PC		SPro		ESPro1		ESPro2		ESPro3
Mean	SD	Mean	SD	Mean	SD	Mean	SD	Mean	SD	Mean	SD	Mean	SD
165.439	7.09971	103.275	38.3084	172.303	6.70347	151.659	26.6055	178.107	24.3243	158.128	34.2145	144.029	19.1204
Figure 5C
MDA (nmol/mg protein)
NC		DM		PC		SPro		ESPro1		ESPro2		ESPro3
Mean	SD	Mean	SD	Mean	SD	Mean	SD	Mean	SD	Mean	SD	Mean	SD
0.371485	0.0566991	1.20363	0.170652	0.608217	0.149184	0.774444	0.311625	0.661673	0.125182	0.802551	0.218373	0.895575	0.420888
Figure 6A
ALT (U/L)
NC		DM		PC		SPro		ESPro1		ESPro2		ESPro3
Mean	SD	Mean	SD	Mean	SD	Mean	SD	Mean	SD	Mean	SD	Mean	SD
74.3333	11.3725	116	18.3303	103.667	10.504	134.333	20.4287	76.3333	15.5671	77	12.1244	135	19.6977
Figure 6B
AST (U/L)
NC		DM		PC		SPro		ESPro1		ESPro2		ESPro3
Mean	SD	Mean	SD	Mean	SD	Mean	SD	Mean	SD	Mean	SD	Mean	SD
213.3	23.6	302	40.3	225.7	17.6	274	61.3	217	52.1	213.3	49.8	281.7	19.4
Figure 6C
Liver injury score
NC		DM		PC		SPro		ESPro1		ESPro2		ESPro3
Mean	SD	Mean	SD	Mean	SD	Mean	SD	Mean	SD	Mean	SD	Mean	SD
0	0	3.16667	0.408248	0.833333	0.408248	2.33333	0.516398	1.16667	0.408248	1.33333	0.516398	1.5	0.547723
Figure 6D
Pancreatic injury score
NC		DM		PC		SPro		ESPro1		ESPro2		ESPro3
Mean	SD	Mean	SD	Mean	SD	Mean	SD	Mean	SD	Mean	SD	Mean	SD
0	0	2.83333	0.408248	1.16667	0.408248	2	0.632456	1.5	0.547723	1.66667	0.816497	2.16667	0.752773
Table 1
Peptide	Amino acids	Key amino acid	Molecular weight (Da)	α-glucosidase inhibitory activity (%)
LVPR	4	4	483.6	14.86	0.71
LLPR	4	4	497.63	27.98	1.26
VSLPR	5	4	570.69	28.89	1.22
SVLSPK	6	3	629.75	30.99	1.35
LLRPPK	6	5	722.93	46.98	0.63
KDFPPR	6	3	758.88	41.52	1.62
