# Supplementary material for: Isolation and identification of an α-glucosidase inhibitory peptide from extruded soybean protein and its hypoglycemic activity in T2DM mice
Source: Royal Society of Chemistry journal article supplement (doi:10.1039/d3fo00580a), 2023-01-01
Supplement: d3fo00580a4.pdf [file d3fo00580a4.pdf]

**Table S1** Composition of high-fat diet and AIN-93M diet.

| Ingredients        | High-fat diet | AIN-93M diet |
|--------------------|---------------|--------------|
| Casein             | 258.4         | 140.0        |
| L-Cystine          | 3.9           | 1.8          |
| Corn Starch        | 0.0           | 495.7        |
| Maltodextrin       | 161.5         | 125.0        |
| Sucrose            | 88.9          | 100.0        |
| Cellulose          | 64.6          | 50.0         |
| Soybean Oil        | 32.3          | 40.0         |
| Lard               | 316.6         | -            |
| Mineral Mix        | 58.2          | 35.0         |
| Vitamin Mix        | 12.9          | 10.0         |
| Choline Bitartrate | 2.6           | 2.5          |
| FD&C Blue Dye      | 0.1           | -            |
| Energy (kcal)      | 5243.0        | 3850.0       |
